# Supplementary material
Source: PubMed Central journal article supplement (PMC3347329)

## Supplemental S1

### (1A) Summary of proteins identified and quantified.

Protein names are given according to the NCBI protein database nomenclature.

Protein description was extracted from the same databases.

| <b>Protein name</b> | <b>Protein description</b>                                                                          | <b>No</b> | <b>RA (I/M)</b> | <b>SD</b> |
|---------------------|-----------------------------------------------------------------------------------------------------|-----------|-----------------|-----------|
| <b>NIDM_HUMAN</b>   | (O96000) NADH-ubiquinone oxidoreductase PDSW subunit (EC 1.6.5.3) (EC 1.6.99.3)                     | 1         | 0.58            | N/A       |
| <b>SPH2_HUMAN</b>   | (P50454) Collagen-binding protein 2 precursor (Colligin 2)                                          | 4         | 0.62            | 0.04      |
| <b>PSD6_HUMAN</b>   | (Q15008) 26S proteasome non-ATPase regulatory subunit 6 (26S proteasome regulatory subunit S10)     | 1         | 0.65            | N/A       |
| <b>MYOM1_HUMAN</b>  | (P52179) Myomesin 1 (190 kDa titin-associated protein) (190 kDa connectin-associated protein)       | 1         | 0.65            | N/A       |
| <b>RS29_HUMAN</b>   | (P62273) 40S ribosomal protein S29                                                                  | 2         | 0.69            | 0.04      |
| <b>BASI_HUMAN</b>   | (P35613) Basigin precursor (CD147 antigen) (Leukocyte activation antigen M6)                        | 3         | 0.71            | 0.06      |
| <b>ABCE1_HUMAN</b>  | (P61221) ATP-binding cassette sub-family E member 1 (RNase L inhibitor) (Ribonuclease 4 inhibitor)  | 1         | 0.71            | N/A       |
| <b>VAS1_HUMAN</b>   | (Q15904) Vacuolar ATP synthase subunit S1 precursor (EC 3.6.3.14) (V-ATPase S1 subunit)             | 1         | 0.72            | N/A       |
| <b>PRS4_HUMAN</b>   | (P62191) 26S protease regulatory subunit 4 (P26s4) (Proteasome 26S subunit ATPase 1)                | 1         | 0.72            | N/A       |
| <b>RL40_HUMAN</b>   | (P62987) 60S ribosomal protein L40 (CEP52)                                                          | 1         | 0.72            | N/A       |
| <b>G3P2_HUMAN</b>   | (P04406) Glyceraldehyde-3-phosphate dehydrogenase, liver (EC 1.2.1.12) (GAPDH)                      | 1         | 0.73            | N/A       |
| <b>FGF2_HUMAN</b>   | (P09038) Heparin-binding growth factor 2 precursor (HBGF-2) (Basic fibroblast growth factor) (BFGF) | 2         | 0.74            | 0.20      |
| <b>RL21_HUMAN</b>   | (P46778) 60S ribosomal protein L21                                                                  | 2         | 0.74            | 0.01      |

|                    |                                                                                                        |    |      |      |
|--------------------|--------------------------------------------------------------------------------------------------------|----|------|------|
| <b>U5S1_HUMAN</b>  | (Q15029) 116 kDa U5 small nuclear ribonucleoprotein component<br>(U5 snRNP-specific protein, 116 kDa)  | 1  | 0.75 | N/A  |
| <b>EF1A1_HUMAN</b> | (P68104) Elongation factor 1-alpha 1 (EF-1-alpha-1)<br>(Elongation factor 1 A-1) (eEF1A-1)             | 8  | 0.75 | 0.13 |
| <b>PDIA3_HUMAN</b> | (P30101) Protein disulfide-isomerase A3 precursor (EC 5.3.4.1) (Disulfide isomerase ER-60) (ERp60)     | 1  | 0.75 | N/A  |
| <b>TCPQ_HUMAN</b>  | (P50990) T-complex protein 1, theta subunit (TCP-1-theta)<br>(CCT-theta)                               | 4  | 0.76 | 0.12 |
| <b>RS12_HUMAN</b>  | (P25398) 40S ribosomal protein S12                                                                     | 4  | 0.76 | 0.15 |
| <b>CXAR_HUMAN</b>  | (P78310) Coxsackievirus and adenovirus receptor precursor (Coxsackievirus B-adenovirus receptor)       | 1  | 0.76 | N/A  |
| <b>RBBP4_HUMAN</b> | (Q09028) Chromatin assembly factor 1 subunit C (CAF-1 subunit C)                                       | 3  | 0.77 | 0.04 |
| <b>MYL6_HUMAN</b>  | (P60660) Myosin light polypeptide 6 (Myosin light chain alkali 3) (Myosin light chain 3) (MLC-3)       | 10 | 0.77 | 0.09 |
| <b>MOT1_HUMAN</b>  | (P53985) Monocarboxylate transporter 1 (MCT1)                                                          | 1  | 0.77 | N/A  |
| <b>VIME_HUMAN</b>  | (P08670) Vimentin                                                                                      | 1  | 0.77 | N/A  |
| <b>PSME3_HUMAN</b> | (P61289) Proteasome activator complex subunit 3<br>(Proteasome activator 28-gamma subunit) (PA28gamma) | 1  | 0.78 | N/A  |
| <b>PCNA_HUMAN</b>  | (P12004) Proliferating cell nuclear antigen (PCNA)<br>(Cyclin)                                         | 1  | 0.78 | N/A  |
| <b>SEPR_HUMAN</b>  | (Q12884) Seprase (EC 3.4.21) (Fibroblast activation protein alpha)                                     | 1  | 0.78 | N/A  |
| <b>IQGA1_HUMAN</b> | (P46940) Ras GTPase-activating-like protein IQGAP1<br>(p195)                                           | 4  | 0.78 | 0.09 |
| <b>UPAR_HUMAN</b>  | (Q03405) Urokinase plasminogen activator surface receptor precursor (uPAR) (U-PAR)                     | 1  | 0.78 | N/A  |
| <b>TCPG_HUMAN</b>  | (P49368) T-complex protein 1, gamma subunit<br>(TCP-1-gamma) (CCT-gamma) (hTRiC5)                      | 3  | 0.79 | 0.06 |

|                    |                                                                                                  |    |      |      |
|--------------------|--------------------------------------------------------------------------------------------------|----|------|------|
| <b>GNA11_HUMAN</b> | (P29992) Guanine nucleotide-binding protein G(y), alpha subunit (Alpha-11)                       | 1  | 0.79 | N/A  |
| <b>CPSM_HUMAN</b>  | (P31327) Carbamoyl-phosphate synthase [ammonia], mitochondrial precursor (EC 6.3.4.16)           | 15 | 0.79 | 0.10 |
| <b>PYR1_HUMAN</b>  | (P27708) CAD protein [Includes: Glutamine-dependent carbamoyl-phosphate synthase (EC 6.3.5.5)]   | 2  | 0.79 | 0.01 |
| <b>TCPB_HUMAN</b>  | (P78371) T-complex protein 1, beta subunit (TCP-1-beta) (CCT-beta)                               | 2  | 0.79 | 0.15 |
| <b>MLRM_HUMAN</b>  | (P19105) Myosin regulatory light chain 2, nonsarcomeric (Myosin RLC)                             | 5  | 0.79 | 0.12 |
| <b>RM03_HUMAN</b>  | (P09001) Mitochondrial 39S ribosomal protein L3 (L3mt) (MRP-L3)                                  | 1  | 0.79 | N/A  |
| <b>IF4G1_HUMAN</b> | (Q04637) Eukaryotic translation initiation factor 4 gamma 1 (eIF-4-gamma 1) (eIF-4G1) (eIF-4G 1) | 2  | 0.79 | 0.03 |
| <b>RL13A_HUMAN</b> | (P40429) 60S ribosomal protein L13a (23 kDa highly basic protein)                                | 1  | 0.80 | N/A  |
| <b>MYH9_HUMAN</b>  | (P35579) Myosin heavy chain, nonmuscle type A (Cellular myosin heavy chain, type A)              | 48 | 0.80 | 0.13 |
| <b>PPBN_HUMAN</b>  | (P10696) Alkaline phosphatase, placental-like precursor (EC 3.1.3.1) (Nagao isozyme)             | 3  | 0.80 | 0.04 |
| <b>EHD2_HUMAN</b>  | (Q9NZN4) EH-domain containing protein 2                                                          | 1  | 0.80 | N/A  |
| <b>DDX39_HUMAN</b> | (O00148) ATP-dependent helicase DDX39 (DEAD-box protein 39) (Nuclear RNA helicase URH49)         | 2  | 0.81 | 0.02 |
| <b>PACN3_HUMAN</b> | (Q9UKS6) Protein kinase C and casein kinase substrate in neurons protein 3                       | 3  | 0.81 | 0.06 |
| <b>RL22_HUMAN</b>  | (P35268) 60S ribosomal protein L22 (Epstein-Barr virus small RNA associated protein)             | 4  | 0.81 | 0.10 |
| <b>EFTU_HUMAN</b>  | (P49411) Elongation factor Tu, mitochondrial precursor (EF-Tu) (P43)                             | 3  | 0.81 | 0.07 |

|                    |                                                                                                    |   |      |      |
|--------------------|----------------------------------------------------------------------------------------------------|---|------|------|
| <b>CLH1_HUMAN</b>  | (Q00610) Clathrin heavy chain 1 (CLH-17)                                                           | 6 | 0.82 | 0.15 |
| <b>KPYM_HUMAN</b>  | (P14618) Pyruvate kinase, isozymes M1/M2<br>(EC 2.7.1.40) (Pyruvate kinase muscle isozyme)         | 6 | 0.82 | 0.16 |
| <b>DHX15_HUMAN</b> | (O43143) Putative pre-mRNA splicing factor RNA<br>helicase (DEAH box protein 15)                   | 1 | 0.82 | N/A  |
| <b>MATR3_HUMAN</b> | (P43243) Matrin 3                                                                                  | 1 | 0.82 | N/A  |
| <b>NUEM_HUMAN</b>  | (Q16795) NADH-ubiquinone oxidoreductase 39 kDa<br>subunit, mitochondrial precursor (EC 1.6.5.3)    | 1 | 0.82 | N/A  |
| <b>PDC6I_HUMAN</b> | (Q8WUM4) Programmed cell death 6-interacting protein<br>(PDCD6-interacting protein)                | 1 | 0.82 | N/A  |
| <b>ROA2_HUMAN</b>  | (P22626) Heterogeneous nuclear ribonucleoproteins<br>A2/B1 (hnRNP A2 / hnRNP B1)                   | 2 | 0.82 | 0.01 |
| <b>ACTN4_HUMAN</b> | (O43707) Alpha-actinin 4 (Non-muscle alpha-actinin 4)<br>(F-actin cross linking protein)           | 8 | 0.82 | 0.13 |
| <b>DDX24_HUMAN</b> | (Q9GZR7) ATP-dependent RNA helicase DDX24<br>(DEAD-box protein 24)                                 | 1 | 0.82 | N/A  |
| <b>NUML_HUMAN</b>  | (O00483) NADH-ubiquinone oxidoreductase MLRQ<br>subunit (EC 1.6.5.3) (EC 1.6.99.3)(Complex I-MLRQ) | 1 | 0.82 | N/A  |
| <b>FUBP3_HUMAN</b> | (Q96I24) Far upstream element binding protein 3 (FUSE<br>binding protein 3)                        | 1 | 0.82 | N/A  |
| <b>SDB84_HUMAN</b> | (Q9Y282) Serologically defined breast cancer antigen<br>NY-BR-84                                   | 1 | 0.83 | N/A  |
| <b>HNRPF_HUMAN</b> | (P52597) Heterogeneous nuclear ribonucleoprotein F<br>(hnRNP F) (Nucleolin-like protein mcs94-1)   | 1 | 0.83 | N/A  |
| <b>RS14_HUMAN</b>  | (P62263) 40S ribosomal protein S14                                                                 | 3 | 0.83 | 0.10 |
| <b>AL1B1_HUMAN</b> | (P30837) Aldehyde dehydrogenase X, mitochondrial<br>precursor (EC 1.2.1.3) (ALDH class 2)          | 1 | 0.83 | N/A  |
| <b>KI67_HUMAN</b>  | (P46013) Antigen KI-67                                                                             | 7 | 0.83 | 0.11 |
| <b>RS15A_HUMAN</b> | (P62244) 40S ribosomal protein S15a                                                                | 2 | 0.84 | 0.03 |
| <b>GBB2_HUMAN</b>  | (P62879) Guanine nucleotide-binding protein                                                        | 5 | 0.84 | 0.08 |

|                    |                                                                                                 |    |      |      |  |
|--------------------|-------------------------------------------------------------------------------------------------|----|------|------|--|
|                    | G(I)/G(S)/G(T)beta subunit 2<br>(Transducin beta chain 2)                                       |    |      |      |  |
| <b>TCPE_HUMAN</b>  | (P48643) T-complex protein 1, epsilon subunit (TCP-1-epsilon) (CCT-epsilon)                     | 4  | 0.84 | 0.12 |  |
| <b>FUS_HUMAN</b>   | (P35637) RNA-binding protein FUS (Oncogene FUS) (Oncogene TLS)                                  | 2  | 0.84 | 0.14 |  |
| <b>RL34_HUMAN</b>  | (P49207) 60S ribosomal protein L34                                                              | 1  | 0.84 | N/A  |  |
| <b>C1TC_HUMAN</b>  | (P11586) C-1-tetrahydrofolate synthase, cytoplasmic (C1-THF synthase)                           | 3  | 0.84 | 0.06 |  |
| <b>CH60_HUMAN</b>  | (P10809) 60 kDa heat shock protein, mitochondrial precursor (Hsp60) (60 kDa chaperonin) (CPN60) | 11 | 0.85 | 0.10 |  |
| <b>ARF1_HUMAN</b>  | (P84077) ADP-ribosylation factor 1                                                              | 2  | 0.85 | 0.02 |  |
| <b>CAV2_HUMAN</b>  | (P51636) Caveolin-2                                                                             | 4  | 0.85 | 0.05 |  |
| <b>STIP1_HUMAN</b> | (P31948) Stress-induced-phosphoprotein 1 (STI1) (Hsc70/Hsp90-organizing protein) (Hop)          | 3  | 0.85 | 0.09 |  |
| <b>CSN2_HUMAN</b>  | (P61201) COP9 signalosome complex subunit 2 (Signalosome subunit 2) (SGN2)                      | 1  | 0.85 | N/A  |  |
| <b>SAR1A_HUMAN</b> | (Q9NR31) GTP-binding protein SAR1a (COPII-associated small GTPase)                              | 1  | 0.85 | N/A  |  |
| <b>GBG12_HUMAN</b> | (Q9UBI6) Guanine nucleotide-binding protein G(I)/G(S)/G(O) gamma-12 subunit                     | 1  | 0.85 | N/A  |  |
| <b>TRXR1_HUMAN</b> | (Q16881) Thioredoxin reductase 1, cytoplasmic precursor (EC1.8.1.9) (TR) (TR1)                  | 1  | 0.85 | N/A  |  |
| <b>ACTB_HUMAN</b>  | (P60709) Actin, cytoplasmic 1 (Beta-actin)                                                      | 4  | 0.86 | 0.11 |  |
| <b>PSL2_HUMAN</b>  | (Q8TCT8) Signal peptide peptidase-like 2A (EC 3.4.99) (SPP-like 2A protein) (SPPL2a protein)    | 1  | 0.86 | N/A  |  |
| <b>RL23_HUMAN</b>  | (P62829) 60S ribosomal protein L23 (Ribosomal protein L17)                                      | 1  | 0.86 | N/A  |  |
| <b>LDHA_HUMAN</b>  | (P00338) L-lactate dehydrogenase A chain (EC 1.1.1.27)(LDH-A) (LDH muscle subunit) (LDH-M)      | 6  | 0.86 | 0.16 |  |

|                    |                                                                                                    |    |      |      |
|--------------------|----------------------------------------------------------------------------------------------------|----|------|------|
| <b>RS10_HUMAN</b>  | (P46783) 40S ribosomal protein S10                                                                 | 2  | 0.86 | 0.07 |
| <b>HS90B_HUMAN</b> | (P08238) Heat shock protein HSP 90-beta (HSP 84) (HSP 90)                                          | 13 | 0.86 | 0.11 |
| <b>BAG2_HUMAN</b>  | (O95816) BAG-family molecular chaperone regulator-2                                                | 3  | 0.86 | 0.05 |
| <b>MAGD2_HUMAN</b> | (Q9UNF1) Melanoma-associated antigen D2 (MAGE-D2 antigen)(MAGE-D)                                  | 2  | 0.86 | 0.07 |
| <b>PROF1_HUMAN</b> | (P07737) Profilin-1 (Profilin I)                                                                   | 3  | 0.86 | 0.13 |
| <b>SF3B2_HUMAN</b> | (Q13435) Splicing factor 3B subunit 2 (Spliceosome associated protein 145) (SAP 145) (SF3b150)     | 1  | 0.87 | N/A  |
| <b>VAT1_HUMAN</b>  | (Q99536) Synaptic vesicle membrane protein VAT-1 homolog                                           | 1  | 0.87 | N/A  |
| <b>TBBX_HUMAN</b>  | (P68371) Tubulin beta-2 chain                                                                      | 10 | 0.87 | 0.16 |
| <b>RLA0_HUMAN</b>  | (P05388) 60S acidic ribosomal protein P0 (L10E)                                                    | 6  | 0.87 | 0.15 |
| <b>TRAP1_HUMAN</b> | (Q12931) Heat shock protein 75 kDa, mitochondrial precursor (HSP 75) (Tumor necrosis factor type 1 | 1  | 0.87 | N/A  |
| <b>RL11_HUMAN</b>  | (P62913) 60S ribosomal protein L11 (CLL-associated antigen KW-12)                                  | 3  | 0.87 | 0.01 |
| <b>ILF2_HUMAN</b>  | (Q12905) Interleukin enhancer-binding factor 2 (Nuclear factor of activated T-cells 45 kDa)        | 2  | 0.88 | 0.05 |
| <b>PGK1_HUMAN</b>  | (P00558) Phosphoglycerate kinase 1 (EC 2.7.2.3) (Primer recognition protein 2) (PRP 2)             | 5  | 0.88 | 0.14 |
| <b>SYTC_HUMAN</b>  | (P26639) Threonyl-tRNA synthetase, cytoplasmic (EC 6.1.1.3) (Threonine--tRNA ligase) (ThrRS)       | 1  | 0.88 | N/A  |
| <b>VPP3_HUMAN</b>  | (Q13488) Vacuolar proton translocating ATPase 116 kDa subunit a isoform 3                          | 2  | 0.88 | 0.11 |
| <b>RS27L_HUMAN</b> | (Q71UM5) 40S ribosomal protein S27-like protein                                                    | 2  | 0.88 | 0.01 |
| <b>ACADM_HUMAN</b> | (P11310) Acyl-CoA dehydrogenase, medium-chain specific, mitochondrial precursor (EC 1.3.99.3)      | 1  | 0.88 | N/A  |
| <b>DDX5_HUMAN</b>  | (P17844) Probable RNA-dependent helicase p68 (DEAD-box protein p68) (DEAD-box protein 5)           | 2  | 0.88 | 0.06 |

|                    |                                                                                                           |    |      |      |
|--------------------|-----------------------------------------------------------------------------------------------------------|----|------|------|
| <b>PLAK_HUMAN</b>  | (P14923) Junction plakoglobin (Desmoplakin III)                                                           | 3  | 0.88 | 0.04 |
| <b>RS19_HUMAN</b>  | (P39019) 40S ribosomal protein S19                                                                        | 1  | 0.88 | N/A  |
| <b>RS23_HUMAN</b>  | (P62266) 40S ribosomal protein S23                                                                        | 3  | 0.88 | 0.09 |
| <b>RS18_HUMAN</b>  | (P62269) 40S ribosomal protein S18 (Ke-3) (Ke3)                                                           | 3  | 0.88 | 0.11 |
| <b>RHOG_HUMAN</b>  | (P84095) Rho-related GTP-binding protein                                                                  | 2  | 0.88 | 0.06 |
| <b>NEGR1_HUMAN</b> | (Q7Z3B1) Neuronal growth regulator 1 precursor                                                            | 3  | 0.88 | 0.02 |
| <b>GBB1_HUMAN</b>  | (P62873) Guanine nucleotide-binding protein<br>G(I)/G(S)/G(T) beta subunit 1<br>(Transducin beta chain 1) | 4  | 0.88 | 0.16 |
| <b>TCPD_HUMAN</b>  | (P50991) T-complex protein 1, delta subunit<br>(TCP-1-delta) (CCT-delta)                                  | 2  | 0.88 | 0.12 |
| <b>FOLR1_HUMAN</b> | (P15328) Folate receptor alpha precursor (FR-alpha)<br>(Folate receptor 1) (Folate receptor, adult)       | 1  | 0.88 | N/A  |
| <b>UFD1_HUMAN</b>  | (Q92890) Ubiquitin fusion degradation protein 1 homolog<br>(UB fusion protein 1)                          | 1  | 0.89 | N/A  |
| <b>DAF_HUMAN</b>   | (P08174) Complement decay-accelerating factor precursor<br>(CD55 antigen)                                 | 3  | 0.89 | 0.13 |
| <b>K1C9_HUMAN</b>  | (P35527) Keratin, type I cytoskeletal 9 (Cytokeratin 9)<br>(K9) (CK 9)                                    | 3  | 0.89 | 0.15 |
| <b>SF3B3_HUMAN</b> | (Q15393) Splicing factor 3B subunit 3 (Spliceosome<br>associated protein 130) (SAP 130) (SF3b130)         | 1  | 0.89 | N/A  |
| <b>PALM_HUMAN</b>  | (O75781) Paralemmin                                                                                       | 5  | 0.89 | 0.13 |
| <b>TBB2_HUMAN</b>  | (P07437) Tubulin beta-2 chain                                                                             | 11 | 0.89 | 0.17 |
| <b>SPFH1_HUMAN</b> | (O75477) SPFH domain protein 1 precursor (Protein<br>KE04)                                                | 9  | 0.89 | 0.14 |
| <b>GAPR1_HUMAN</b> | (Q9H4G4) Golgi-associated plant pathogenesis-related<br>protein 1 (Golgi-associated PR-1 protein)         | 3  | 0.90 | 0.15 |
| <b>SRP72_HUMAN</b> | (O76094) Signal recognition particle 72 kDa protein<br>(SRP72)                                            | 1  | 0.90 | N/A  |
| <b>STML2_HUMAN</b> | (Q9UJZ1) Stomatin-like protein 2 (SLP-2)                                                                  | 5  | 0.90 | 0.13 |

|                    |                                                                                                |   |      |      |
|--------------------|------------------------------------------------------------------------------------------------|---|------|------|
|                    | (EPB72-like 2)                                                                                 |   |      |      |
| <b>RM44_HUMAN</b>  | (Q9H9J2) 39S ribosomal protein L44, mitochondrial precursor (EC 3.1.26.-) (L44mt) (MRP-L44)    | 1 | 0.90 | N/A  |
| <b>HNRPK_HUMAN</b> | (P61978) Heterogeneous nuclear ribonucleoprotein K (hnRNP K)                                   | 2 | 0.90 | 0.11 |
| <b>THIM_HUMAN</b>  | (P42765) 3-ketoacyl-CoA thiolase, mitochondrial (EC 2.3.1.16) (Beta-ketothiolase)              | 1 | 0.90 | N/A  |
| <b>RL17_HUMAN</b>  | (P18621) 60S ribosomal protein L17 (L23)                                                       | 3 | 0.91 | 0.11 |
| <b>APOB_HUMAN</b>  | (P04114) Apolipoprotein B-100 precursor (Apo B-100) [Contains: Apolipoprotein B-48 (Apo B-48)] | 1 | 0.91 | N/A  |
| <b>RL18_HUMAN</b>  | (Q07020) 60S ribosomal protein L18                                                             | 2 | 0.91 | 0.02 |
| <b>PTRF_HUMAN</b>  | (Q6NZI2) Polymerase I and transcript release factor (PTRF protein) (FKSG13 protein)            | 3 | 0.91 | 0.14 |
| <b>ENPL_HUMAN</b>  | (P14625) Endoplasmic precursor (94 kDa glucose-regulated protein) (GRP94) (gp96 homolog)       | 6 | 0.91 | 0.12 |
| <b>RS4X_HUMAN</b>  | (P62701) 40S ribosomal protein S4, X isoform (Single copy abundant mRNA protein) (SCR10)       | 7 | 0.91 | 0.07 |
| <b>BI1_HUMAN</b>   | (P55061) Bax inhibitor-1 (BI-1) (Testis enhanced gene transcript)                              | 1 | 0.91 | N/A  |
| <b>MSLN_HUMAN</b>  | (Q13421) Mesothelin precursor (CAK1 antigen)                                                   | 4 | 0.91 | 0.15 |
| <b>RHOB_HUMAN</b>  | (P62745) Rho-related GTP-binding protein RhoB (H6)                                             | 1 | 0.91 | N/A  |
| <b>SYK_HUMAN</b>   | (Q15046) Lysyl-tRNA synthetase (EC 6.1.1.6) (Lysine--tRNA ligase) (LysRS)                      | 2 | 0.91 | 0.07 |
| <b>AT5F1_HUMAN</b> | (P24539) ATP synthase B chain, mitochondrial precursor (EC 3.6.3.14)                           | 2 | 0.91 | 0.11 |
| <b>H2BA_HUMAN</b>  | (P62807) Histone H2B.a/g/h/k/l (H2B.1 A) (H2B/a) (H2B/g) (H2B/h) (H2B/k) (H2B/l)               | 2 | 0.91 | 0.10 |
| <b>H2BF_HUMAN</b>  | (P33778) Histone H2B.f (H2B/f) (H2B.1)                                                         | 1 | 0.92 | N/A  |
| <b>SYR_HUMAN</b>   | (P54136) Arginyl-tRNA synthetase (EC 6.1.1.19) (Arginine--tRNA ligase) (ArgRS)                 | 2 | 0.92 | 0.00 |



|                    |                                                                                                        |   |      |      |
|--------------------|--------------------------------------------------------------------------------------------------------|---|------|------|
| <b>TBAK_HUMAN</b>  | (P68363) Tubulin alpha-ubiquitous chain<br>(Alpha-tubulin ubiquitous) (Tubulin K-alpha-1)              | 8 | 0.92 | 0.17 |
| <b>NCOA4_HUMAN</b> | (Q13772) Nuclear receptor coactivator 4 (NCoA-4) (70<br>kDa androgen receptor coactivator)             | 1 | 0.92 | N/A  |
| <b>EFNA1_HUMAN</b> | (P20827) Ephrin-A1 precursor (EPH-related receptor<br>tyrosine kinase ligand 1) (LERK-1)               | 2 | 0.92 | 0.01 |
| <b>ODPB_HUMAN</b>  | (P11177) Pyruvate dehydrogenase E1 component beta<br>subunit, mitochondrial precursor (EC 1.2.4.1)     | 1 | 0.92 | N/A  |
| <b>CD59_HUMAN</b>  | (P13987) CD59 glycoprotein precursor (Membrane attack<br>complex inhibition factor) (MACIF)            | 1 | 0.92 | N/A  |
| <b>IF36_HUMAN</b>  | (P60228) Eukaryotic translation initiation factor 3 subunit<br>6 (eIF-3 p48) (eIF3e)                   | 1 | 0.92 | N/A  |
| <b>RLA2_HUMAN</b>  | (P05387) 60S acidic ribosomal protein P2                                                               | 5 | 0.92 | 0.11 |
| <b>STOM_HUMAN</b>  | (P27105) Erythrocyte band 7 integral membrane protein<br>(Stomatin) (Protein 7.2b)                     | 6 | 0.92 | 0.06 |
| <b>TBA1_HUMAN</b>  | (P68366) Tubulin alpha-1 chain (Alpha-tubulin 1)<br>(Testis-specific alpha-tubulin) (Tubulin H2-alpha) | 7 | 0.92 | 0.17 |
| <b>GNL3_HUMAN</b>  | (Q9BVP2) Guanine nucleotide binding protein-like 3<br>(Nucleolar GTP-binding protein 3) (Nucleostemin) | 1 | 0.92 | N/A  |
| <b>PUR6_HUMAN</b>  | (P22234) Multifunctional protein ADE2                                                                  | 2 | 0.93 | 0.08 |
| <b>HNRPC_HUMAN</b> | (P07910) Heterogeneous nuclear ribonucleoproteins<br>C1/C2 (hnRNP C1 / hnRNP C2)                       | 3 | 0.93 | 0.07 |
| <b>RS6_HUMAN</b>   | (P62753) 40S ribosomal protein S6<br>(Phosphoprotein NP33)                                             | 2 | 0.93 | 0.10 |
| <b>HDAC1_HUMAN</b> | (Q13547) Histone deacetylase 1 (HD1)                                                                   | 1 | 0.93 | N/A  |
| <b>GDIB_HUMAN</b>  | (P50395) Rab GDP dissociation inhibitor beta (Rab GDI<br>beta) (GDI-2)                                 | 2 | 0.93 | 0.01 |
| <b>EF2_HUMAN</b>   | (P13639) Elongation factor 2 (EF-2)                                                                    | 2 | 0.93 | 0.01 |
| <b>IF4G2_HUMAN</b> | (P78344) Eukaryotic translation initiation factor 4 gamma<br>2 (eIF-4-gamma 2) (eIF-4G 2) (eIF4G 2)    | 2 | 0.93 | 0.07 |

|                    |                                                                                                        |    |      |      |
|--------------------|--------------------------------------------------------------------------------------------------------|----|------|------|
| <b>RGS19_HUMAN</b> | (P49795) Regulator of G-protein signaling 19 (RGS19)<br>(G-alpha interacting protein) (GAIP protein)   | 2  | 0.93 | 0.05 |
| <b>CAC2D_HUMAN</b> | (P54289) Dihydropyridine-sensitive L-type, calcium<br>channel alpha-2/delta subunits precursor         | 13 | 0.93 | 0.11 |
| <b>EPHA5_HUMAN</b> | (P54756) Ephrin type-A receptor 5 precursor (EC<br>2.7.1.112) (Tyrosine-protein kinase receptor EHK-1) | 2  | 0.93 | 0.08 |
| <b>G3P1_HUMAN</b>  | (P00354) Glyceraldehyde-3-phosphate dehydrogenase,<br>muscle (EC 1.2.1.12) (GAPDH)                     | 1  | 0.94 | N/A  |
| <b>RL26L_HUMAN</b> | (Q9UNX3) 60S ribosomal protein L26-like 1                                                              | 1  | 0.94 | N/A  |
| <b>RL27_HUMAN</b>  | (P61353) 60S ribosomal protein L27                                                                     | 2  | 0.94 | 0.05 |
| <b>MCA1_HUMAN</b>  | (Q12904) Multisynthetase complex auxiliary component<br>p43                                            | 1  | 0.94 | N/A  |
| <b>RAC1_HUMAN</b>  | (P63000) Ras-related C3 botulinum toxin substrate 1<br>(p21-Rac1) (Ras-like protein TC25)              | 3  | 0.94 | 0.04 |
| <b>PTBP1_HUMAN</b> | (P26599) Polypyrimidine tract-binding protein 1 (PTB)<br>(Heterogeneous nuclear ribonucleoprotein I)   | 1  | 0.94 | N/A  |
| <b>RAB5B_HUMAN</b> | (P61020) Ras-related protein Rab-5B                                                                    | 3  | 0.94 | 0.11 |
| <b>STAT3_HUMAN</b> | (P40763) Signal transducer and activator of transcription 3<br>(Acute-phase response factor)           | 2  | 0.94 | 0.08 |
| <b>OSR8_HUMAN</b>  | (Q9BZF1) Oxysterol binding protein-related protein 8<br>(OSBP-related protein 8) (ORP-8)               | 1  | 0.94 | N/A  |
| <b>TBB4_HUMAN</b>  | (P04350) Tubulin beta-4 chain (Tubulin 5 beta)                                                         | 4  | 0.94 | 0.13 |
| <b>HS90A_HUMAN</b> | (P07900) Heat shock protein HSP 90-alpha (HSP 86)                                                      | 11 | 0.94 | 0.17 |
| <b>MRP_HUMAN</b>   | (P49006) MARCKS-related protein (Macrophage<br>myristoylated alanine-rich C kinase substrate)          | 1  | 0.95 | N/A  |
| <b>PSME1_HUMAN</b> | (Q06323) Proteasome activator complex subunit 1<br>(Proteasome activator 28-alpha subunit) (PA28alpha) | 1  | 0.95 | N/A  |
| <b>SMC2_HUMAN</b>  | (O95347) Structural maintenance of chromosome 2-like 1<br>protein (Chromosome-associated protein E)    | 2  | 0.95 | 0.10 |
| <b>IF33_HUMAN</b>  | (O15372) Eukaryotic translation initiation factor 3 subunit                                            | 1  | 0.95 | N/A  |

|                    |                                                                                                     |    |      |      |  |
|--------------------|-----------------------------------------------------------------------------------------------------|----|------|------|--|
|                    | 3 (eIF-3 gamma) (eIF3 p40 subunit)                                                                  |    |      |      |  |
| <b>SPTA2_HUMAN</b> | (Q13813) Spectrin alpha chain, brain (Spectrin, non-erythroid alpha chain) (Alpha-II spectrin)      | 4  | 0.95 | 0.12 |  |
| <b>CMC2_HUMAN</b>  | (Q9UJS0) Calcium-binding mitochondrial carrier protein Aralar2                                      | 2  | 0.95 | 0.16 |  |
| <b>RAI3_HUMAN</b>  | (Q8NFJ5) Retinoic acid induced 3 protein (G-protein coupled receptor family C group 5 member A) (Re | 1  | 0.95 | N/A  |  |
| <b>IPO11_HUMAN</b> | (Q9UI26) Importin-11 (Imp11) (Ran-binding protein 11) (RanBP11)                                     | 1  | 0.95 | N/A  |  |
| <b>TCP4_HUMAN</b>  | (P53999) Activated RNA polymerase II transcriptional coactivator p15 (Positive cofactor 4) (PC4)    | 2  | 0.95 | 0.09 |  |
| <b>LEG3_HUMAN</b>  | (P17931) Galectin-3 (Galactose-specific lectin 3) (Mac-2 antigen) (IgE-binding protein)             | 2  | 0.95 | 0.12 |  |
| <b>RS11_HUMAN</b>  | (P62280) 40S ribosomal protein S11                                                                  | 3  | 0.95 | 0.18 |  |
| <b>TIF1B_HUMAN</b> | (Q13263) Transcription intermediary factor 1-beta (TIF1-beta) (Tripartite motif protein 28)         | 1  | 0.95 | N/A  |  |
| <b>SDCB1_HUMAN</b> | (O00560) Syntenin-1 (Syndecan binding protein 1) (Melanoma differentiation-associated protein 9)    | 4  | 0.95 | 0.10 |  |
| <b>IF41_HUMAN</b>  | (P60842) Eukaryotic initiation factor 4A-I (eIF4A-I) (eIF-4A-I)                                     | 2  | 0.95 | 0.02 |  |
| <b>DSG2_HUMAN</b>  | (Q14126) Desmoglein-2 precursor (HDGC)                                                              | 10 | 0.95 | 0.14 |  |
| <b>BST2_HUMAN</b>  | (Q10589) Bone marrow stromal antigen 2 (BST-2)                                                      | 1  | 0.95 | N/A  |  |
| <b>S10A4_HUMAN</b> | (P26447) S100 calcium-binding protein A4 (Metastasin) (Mts1protein)                                 | 3  | 0.95 | 0.05 |  |
| <b>CAV1_HUMAN</b>  | (Q03135) Caveolin-1                                                                                 | 4  | 0.95 | 0.15 |  |
| <b>THOC2_HUMAN</b> | (Q8NI27) THO complex subunit 2 (Tho2)                                                               | 1  | 0.95 | N/A  |  |
| <b>IMB3_HUMAN</b>  | (O00410) Importin beta-3 (Karyopherin beta-3) (Ran-binding protein 5) (RanBP5)                      | 3  | 0.96 | 0.13 |  |
| <b>K0830_HUMAN</b> | (O94919) Probable endonuclease KIAA0830 precursor (EC 3.1.30.-)                                     | 2  | 0.96 | 0.01 |  |

|                    |                                                                                                   |    |      |      |
|--------------------|---------------------------------------------------------------------------------------------------|----|------|------|
| <b>RET1G_HUMAN</b> | (Q6H3X3) Retinoic acid early transcript 1G protein precursor                                      | 1  | 0.96 | N/A  |
| <b>KU70_HUMAN</b>  | (P12956) ATP-dependent DNA helicase II, 70 kDa subunit (Lupus Ku autoantigen protein p70) (Ku70)  | 11 | 0.96 | 0.13 |
| <b>RUXE_HUMAN</b>  | (P62304) Small nuclear ribonucleoprotein E (snRNP-E) (Sm protein E) (Sm-E) (SmE)                  | 3  | 0.96 | 0.04 |
| <b>PSD11_HUMAN</b> | (O00231) 26S proteasome non-ATPase regulatory subunit 11 (26S proteasome regulatory subunit S9)   | 1  | 0.96 | N/A  |
| <b>DNSL1_HUMAN</b> | (P49184) Deoxyribonuclease I-like 1 precursor (EC 3.1.21.-) (DNase I-like 1)                      | 2  | 0.96 | 0.03 |
| <b>NU4M_HUMAN</b>  | (P03905) NADH-ubiquinone oxidoreductase chain 4 (EC1.6.5.3) (NADH dehydrogenase subunit 4)        | 1  | 0.96 | N/A  |
| <b>RL7A_HUMAN</b>  | (P62424) 60S ribosomal protein L7a (Surfeit locus protein 3) (PLA-X polypeptide)                  | 4  | 0.96 | 0.09 |
| <b>IF3C_HUMAN</b>  | (Q9UBQ5) Eukaryotic translation initiation factor 3 subunit 12 (eIF-3 p25) (eIF3k)                | 3  | 0.97 | 0.05 |
| <b>CAD13_HUMAN</b> | (P55290) Cadherin-13 precursor (Truncated-cadherin)(T-cadherin) (T-cad) (Heart-cadherin)          | 6  | 0.97 | 0.17 |
| <b>ANXA5_HUMAN</b> | (P08758) Annexin A5 (Annexin V) (Lipocortin V) (Endonexin II) (Calphobindin I) (CBP-I)            | 2  | 0.97 | 0.12 |
| <b>MRP1_HUMAN</b>  | (P33527) Multidrug resistance-associated protein 1 (ATP-binding cassette, sub-family C, member 1) | 1  | 0.97 | N/A  |
| <b>PSA7_HUMAN</b>  | (O14818) Proteasome subunit alpha type 7 (EC 3.4.25.1) (Proteasome subunit RC6-1)                 | 2  | 0.97 | 0.09 |
| <b>RS2_HUMAN</b>   | (P15880) 40S ribosomal protein S2 (S4) (LLRep3 protein)                                           | 7  | 0.97 | 0.14 |
| <b>NP1L1_HUMAN</b> | (P55209) Nucleosome assembly protein 1-like 1 (NAP-1 related protein) (hNRP)                      | 4  | 0.97 | 0.13 |
| <b>G6PI_HUMAN</b>  | (P06744) Glucose-6-phosphate isomerase (EC 5.3.1.9) (GPI) (Phosphoglucose isomerase) (PGI)        | 1  | 0.97 | N/A  |

|                    |                                                                                                       |    |      |      |
|--------------------|-------------------------------------------------------------------------------------------------------|----|------|------|
| <b>FLNA_HUMAN</b>  | (P21333) Filamin A (Alpha-filamin) (Filamin 1)<br>(Endothelial actin-binding protein)                 | 19 | 0.97 | 0.15 |
| <b>SSRG_HUMAN</b>  | (Q9UNL2) Translocon-associated protein gamma subunit<br>(TRAP-gamma)                                  | 2  | 0.97 | 0.12 |
| <b>5NTD_HUMAN</b>  | (P21589) 5'-nucleotidase precursor (EC 3.1.3.5) (Ecto-<br>5'-nucleotidase) (5'-NT) (CD73 antigen)     | 9  | 0.97 | 0.09 |
| <b>SYEP_HUMAN</b>  | (P07814) Bifunctional aminoacyl-tRNA synthetase<br>[Includes: Glutamyl-tRNA synthetase (EC 6.1.1.17)] | 4  | 0.97 | 0.11 |
| <b>LAMA_HUMAN</b>  | (P02545) Lamin A/C (70 kDa lamin)                                                                     | 4  | 0.98 | 0.15 |
| <b>MCM5_HUMAN</b>  | (P33992) DNA replication licensing factor MCM5<br>(CDC46 homolog) (P1-CDC46)                          | 1  | 0.98 | N/A  |
| <b>KU86_HUMAN</b>  | (P13010) ATP-dependent DNA helicase II, 80 kDa subunit<br>(Lupus Ku autoantigen protein p86) (Ku86)   | 13 | 0.98 | 0.13 |
| <b>PABP1_HUMAN</b> | (P11940) Polyadenylate-binding protein 1<br>(Poly(A)-binding protein 1) (PABP 1)                      | 13 | 0.98 | 0.16 |
| <b>H4_HUMAN</b>    | (P62805) Histone H4                                                                                   | 4  | 0.98 | 0.06 |
| <b>ACSL3_HUMAN</b> | (O95573) Long-chain-fatty-acid--CoA ligase 3 (EC<br>6.2.1.3) (Long-chain acyl-CoA synthetase 3)       | 4  | 0.98 | 0.14 |
| <b>SEM3C_HUMAN</b> | (Q99985) Semaphorin 3C precursor (Semaphorin E)                                                       | 1  | 0.98 | N/A  |
| <b>RS3_HUMAN</b>   | (P23396) 40S ribosomal protein S3                                                                     | 5  | 0.98 | 0.12 |
| <b>FLOT2_HUMAN</b> | (Q14254) Flotillin-2 (Epidermal surface antigen, ESA)                                                 | 8  | 0.98 | 0.19 |
| <b>U2AF2_HUMAN</b> | (P26368) Splicing factor U2AF 65 kDa subunit<br>(U2 auxiliary factor 65 kDa subunit)                  | 1  | 0.98 | N/A  |
| <b>TKT_HUMAN</b>   | (P29401) Transketolase (EC 2.2.1.1) (TK)                                                              | 7  | 0.99 | 0.14 |
| <b>RAN_HUMAN</b>   | (P62826) GTP-binding nuclear protein Ran<br>(GTPase Ran) (Ras-like protein TC4)                       | 7  | 0.99 | 0.15 |
| <b>PABP4_HUMAN</b> | (Q13310) Polyadenylate-binding protein 4 (Poly(A)-<br>binding protein 4) (PABP 4)                     | 6  | 0.99 | 0.14 |
| <b>KINH_HUMAN</b>  | (P33176) Kinesin heavy chain<br>(Ubiquitous kinesin heavy chain, UKHC)                                | 1  | 0.99 | N/A  |

|                    |                                                                                                    |    |      |      |
|--------------------|----------------------------------------------------------------------------------------------------|----|------|------|
| <b>CH002_HUMAN</b> | (O94905) Protein C8orf2<br>(UNQ2441/PRO9924/PRO5003)                                               | 14 | 0.99 | 0.07 |
| <b>P5CS_HUMAN</b>  | (P54886) Delta 1-pyrroline-5-carboxylate synthetase<br>(P5CS)                                      | 1  | 0.99 | N/A  |
| <b>VATL_HUMAN</b>  | (P27449) Vacuolar ATP synthase 16 kDa proteolipid<br>subunit (EC 3.6.3.14)                         | 5  | 0.99 | 0.12 |
| <b>PLEC1_HUMAN</b> | (Q15149) Plectin 1 (PLTN) (PCN) (Hemidesmosomal<br>protein 1) (HD1)                                | 9  | 0.99 | 0.10 |
| <b>THY1_HUMAN</b>  | (P04216) Thy-1 membrane glycoprotein precursor (Thy-1<br>antigen) (CDw90) (CD90 antigen)           | 1  | 0.99 | N/A  |
| <b>RL35A_HUMAN</b> | (P18077) 60S ribosomal protein L35a                                                                | 2  | 0.99 | 0.03 |
| <b>GRP75_HUMAN</b> | (P38646) Stress-70 protein, mitochondrial precursor (75<br>kDa glucose regulated protein) (GRP 75) | 4  | 1.00 | 0.16 |
| <b>RL7_HUMAN</b>   | (P18124) 60S ribosomal protein L7                                                                  | 5  | 1.00 | 0.03 |
| <b>FSCN1_HUMAN</b> | (Q16658) Fascin (Singed-like protein)<br>(55 kDa actin bundling protein) (p55)                     | 2  | 1.00 | 0.19 |
| <b>FLOT1_HUMAN</b> | (O75955) Flotillin-1                                                                               | 12 | 1.00 | 0.15 |
| <b>SPTB2_HUMAN</b> | (Q01082) Spectrin beta chain, brain 1<br>(Spectrin, non-erythroid beta chain1)(Beta-II spectrin)   | 1  | 1.00 | N/A  |
| <b>GPC1_HUMAN</b>  | (P35052) Glypican-1 precursor                                                                      | 4  | 1.00 | 0.16 |
| <b>HNRH1_HUMAN</b> | (P31943) Heterogeneous nuclear ribonucleoprotein H<br>(hnRNP H)                                    | 1  | 1.00 | N/A  |
| <b>RS25_HUMAN</b>  | (P62851) 40S ribosomal protein S25                                                                 | 2  | 1.00 | 0.08 |
| <b>PPBT_HUMAN</b>  | (P05186) Alkaline phosphatase, tissue-nonspecific<br>isozyme precursor (EC 3.1.3.1) (AP-TNAP)      | 7  | 1.00 | 0.13 |
| <b>PSB4_HUMAN</b>  | (P28070) Proteasome subunit beta type 4 precursor (EC<br>3.4.25.1) (Proteasome beta chain)         | 2  | 1.00 | 0.19 |
| <b>GRP78_HUMAN</b> | (P11021) 78 kDa glucose-regulated protein precursor<br>(GRP 78)                                    | 15 | 1.00 | 0.08 |
| <b>RAB31_HUMAN</b> | (Q13636) Ras-related protein Rab-31 (Rab-22B)                                                      | 2  | 1.00 | 0.16 |

|                    |                                                                                                      |   |      |      |
|--------------------|------------------------------------------------------------------------------------------------------|---|------|------|
| <b>PHB_HUMAN</b>   | (P35232) Prohibitin                                                                                  | 2 | 1.00 | 0.08 |
| <b>1433E_HUMAN</b> | (P62258) 14-3-3 protein epsilon (14-3-3E)                                                            | 3 | 1.00 | 0.12 |
| <b>COX7C_HUMAN</b> | (P15954) Cytochrome c oxidase polypeptide VIIc, mitochondrial precursor (EC 1.9.3.1)                 | 1 | 1.01 | N/A  |
| <b>CD166_HUMAN</b> | (Q13740) CD166 antigen precursor (Activated leukocyte-cell adhesion molecule) (ALCAM)                | 1 | 1.01 | N/A  |
| <b>SSB_HUMAN</b>   | (Q04837) Single-stranded DNA-binding protein, mitochondrial precursor (Mt-SSB) (MtSSB)               | 1 | 1.01 | N/A  |
| <b>PDIA1_HUMAN</b> | (P07237) Protein disulfide-isomerase precursor (EC 5.3.4.1)(PDI)                                     | 5 | 1.01 | 0.12 |
| <b>TCPZ_HUMAN</b>  | (P40227) T-complex protein 1, zeta subunit (TCP-1-zeta) (CCT-zeta) (CCT-zeta-1) (Tcp20) (HTR3)       | 5 | 1.01 | 0.12 |
| <b>K1C10_HUMAN</b> | (P13645) Keratin, type I cytoskeletal 10 (Cytokeratin 10) (K10) (CK 10)                              | 1 | 1.01 | N/A  |
| <b>TBA3_HUMAN</b>  | (Q71U36) Tubulin alpha-3 chain (Alpha-tubulin 3) (Tubulin B-alpha-1)                                 | 6 | 1.01 | 0.18 |
| <b>HSP71_HUMAN</b> | (P08107) Heat shock 70 kDa protein 1 (HSP70.1) (HSP70-1/HSP70-2)                                     | 1 | 1.01 | N/A  |
| <b>ITPR1_HUMAN</b> | (Q14643) Inositol 1,4,5-trisphosphate receptor type 1 (Type 1 inositol 1,4,5-trisphosphate receptor) | 1 | 1.01 | N/A  |
| <b>DHX9_HUMAN</b>  | (Q08211) ATP-dependent RNA helicase A (Nuclear DNA helicase II) (NDH II) (DEAH-box protein 9)        | 3 | 1.01 | 0.06 |
| <b>TMED9_HUMAN</b> | (Q9BVK6) Transmembrane emp24 domain containing protein 9 precursor (Glycoprotein 25L2)               | 2 | 1.01 | 0.01 |
| <b>RAB32_HUMAN</b> | (Q13637) Ras-related protein Rab-32                                                                  | 2 | 1.01 | 0.11 |
| <b>UGDH_HUMAN</b>  | (O60701) UDP-glucose 6-dehydrogenase (EC 1.1.1.22) (UDP-Glc dehydrogenase, UDP-GlcDH)                | 1 | 1.01 | N/A  |
| <b>RT34_HUMAN</b>  | (P82930) Mitochondrial 28S ribosomal protein S34 (S34mt) (MRP-S34)                                   | 1 | 1.02 | N/A  |
| <b>RL38_HUMAN</b>  | (P63173) 60S ribosomal protein L38                                                                   | 1 | 1.02 | N/A  |

|                    |                                                                                                      |   |      |      |
|--------------------|------------------------------------------------------------------------------------------------------|---|------|------|
| <b>MUC1_HUMAN</b>  | (P15941) Mucin-1 precursor (MUC-1) (Polymorphic epithelial mucin) (PEM) (PEMT) (Episialin)           | 1 | 1.02 | N/A  |
| <b>RS13_HUMAN</b>  | (P62277) 40S ribosomal protein S13                                                                   | 2 | 1.02 | 0.02 |
| <b>ASM3B_HUMAN</b> | (Q92485) Acid sphingomyelinase-like phosphodiesterase 3b precursor (EC 3.1.4.-)                      | 1 | 1.02 | N/A  |
| <b>HNRPL_HUMAN</b> | (P14866) Heterogeneous nuclear ribonucleoprotein L (hnRNP L) (P/OKcl.14)                             | 1 | 1.02 | N/A  |
| <b>LEG8_HUMAN</b>  | (O00214) Galectin-8 (Gal-8) (Prostate carcinoma tumor antigen 1) (PCTA-1)                            | 4 | 1.02 | 0.10 |
| <b>ATPO_HUMAN</b>  | (P48047) ATP synthase oligomycin sensitivity conferral protein, mitochondrial precursor (EC 3.6.3.1) | 4 | 1.02 | 0.12 |
| <b>RT17_HUMAN</b>  | (Q9Y2R5) 28S ribosomal protein S17, mitochondrial precursor (S17mt) (MRP-S17)                        | 1 | 1.02 | N/A  |
| <b>RT29_HUMAN</b>  | (P51398) Mitochondrial 28S ribosomal protein S29 (S29mt) (MRP-S29) (Death-associated protein 3)      | 1 | 1.02 | N/A  |
| <b>GNAI3_HUMAN</b> | (P08754) Guanine nucleotide-binding protein G(k), alpha subunit (G(i) alpha-3)                       | 7 | 1.02 | 0.07 |
| <b>NPM_HUMAN</b>   | (P06748) Nucleophosmin (NPM) (Nucleolar phosphoprotein B23) (Numatrin) (Nucleolar protein NO38)      | 3 | 1.03 | 0.13 |
| <b>RL6_HUMAN</b>   | (Q02878) 60S ribosomal protein L6 (TAX-responsive enhancer element binding protein 107, TAXREB107)   | 2 | 1.03 | 0.03 |
| <b>COX2_HUMAN</b>  | (P00403) Cytochrome c oxidase subunit 2 (EC 1.9.3.1) (Cytochrome c oxidase polypeptide II)           | 1 | 1.03 | N/A  |
| <b>RAB5C_HUMAN</b> | (P51148) Ras-related protein Rab-5C (RAB5L) (L1880)                                                  | 2 | 1.03 | 0.04 |
| <b>TLN1_HUMAN</b>  | (Q9Y490) Talin 1                                                                                     | 3 | 1.03 | 0.10 |
| <b>ANXA1_HUMAN</b> | (P04083) Annexin A1 (Annexin I) (Lipocortin I) (Calpactin II) (Chromobindin 9) (P35)                 | 1 | 1.03 | N/A  |
| <b>TBC15_HUMAN</b> | (Q8TC07) TBC1 domain family member 15                                                                | 1 | 1.03 | N/A  |



|                    |                                                                                                         |   |      |      |
|--------------------|---------------------------------------------------------------------------------------------------------|---|------|------|
| <b>HINT1_HUMAN</b> | (P49773) Histidine triad nucleotide-binding protein 1<br>(Adenosine 5'-monophosphoramidase) (Protein k  | 2 | 1.03 | 0.04 |
| <b>YU20_HUMAN</b>  | (Q9Y3T9) UPF0120 protein DKFZp564C186                                                                   | 1 | 1.03 | N/A  |
| <b>ANT3_HUMAN</b>  | (P01008) Antithrombin-III precursor (ATIII)                                                             | 1 | 1.03 | N/A  |
| <b>PSA1_HUMAN</b>  | (P25786) Proteasome subunit alpha type 1 (EC 3.4.25.1)<br>(Proteasome component C2)                     | 1 | 1.03 | N/A  |
| <b>DDX1_HUMAN</b>  | (Q92499) ATP-dependent helicase DDX1 (DEAD-box<br>protein 1) (DEAD-box protein-retinoblastoma)          | 1 | 1.03 | N/A  |
| <b>GNAI2_HUMAN</b> | (P04899) Guanine nucleotide-binding protein G(i), alpha-2<br>subunit                                    | 5 | 1.03 | 0.08 |
| <b>GEMI4_HUMAN</b> | (P57678) Component of gems 4 (Gemin4)(p97)                                                              | 1 | 1.03 | N/A  |
| <b>KIF23_HUMAN</b> | (Q02241) Kinesin-like protein KIF23 (Mitotic kinesin-like<br>protein-1) (Kinesin-like protein 5)        | 1 | 1.03 | N/A  |
| <b>CG141_HUMAN</b> | (Q9Y3E0) UPF0198 protein CGI-141                                                                        | 1 | 1.03 | N/A  |
| <b>HSP7C_HUMAN</b> | (P11142) Heat shock cognate 71 kDa protein (Heat shock<br>70 kDa protein 8)                             | 6 | 1.04 | 0.19 |
| <b>ACAD9_HUMAN</b> | (Q9H845) Acyl-CoA dehydrogenase family member 9,<br>mitochondrial precursor (EC 1.3.99.-) (ACAD-9)      | 1 | 1.04 | N/A  |
| <b>ENOA_HUMAN</b>  | (P06733) Alpha enolase (EC 4.2.1.11) (2-phospho-D-<br>glycerate hydro-lyase) (Non-neural enolase) (NNE) | 8 | 1.04 | 0.20 |
| <b>CPT1A_HUMAN</b> | (P50416) Carnitine O-palmitoyltransferase I,<br>mitochondrial liver isoform (EC 2.3.1.21)               | 1 | 1.04 | N/A  |
| <b>RAB21_HUMAN</b> | (Q9UL25) Ras-related protein Rab-21                                                                     | 1 | 1.04 | N/A  |
| <b>DDX21_HUMAN</b> | (Q9NR30) Nucleolar RNA helicase II (Nucleolar RNA<br>helicase Gu) (RH II/Gu) (DEAD-box protein 21)      | 7 | 1.04 | 0.12 |
| <b>EF1G_HUMAN</b>  | (P26641) Elongation factor 1-gamma (EF-1-gamma) (eEF-<br>1B gamma)                                      | 2 | 1.04 | 0.05 |
| <b>PIIB_HUMAN</b>  | (P23284) Peptidyl-prolyl cis-trans isomerase B precursor<br>(EC 5.2.1.8) (PPIase) (Rotamase)            | 2 | 1.04 | 0.03 |
| <b>THIO_HUMAN</b>  | (P10599) Thioredoxin (ATL-derived factor, ADF)                                                          | 3 | 1.04 | 0.09 |

| (Surface associated sulphhydryl protein, SASP) |                                                                                                      |   |      |      |
|------------------------------------------------|------------------------------------------------------------------------------------------------------|---|------|------|
| <b>CBPM_HUMAN</b>                              | (P14384) Carboxypeptidase M precursor<br>(EC 3.4.17.12)                                              | 5 | 1.04 | 0.08 |
| <b>RAB2A_HUMAN</b>                             | (P61019) Ras-related protein Rab-2A                                                                  | 2 | 1.04 | 0.01 |
| <b>H13_HUMAN</b>                               | (P16402) Histone H1.3 (Histone H1c)                                                                  | 7 | 1.04 | 0.12 |
| <b>CD47_HUMAN</b>                              | (Q08722) Leukocyte surface antigen CD47 precursor<br>(Antigenic surface determinant protein OA3)     | 4 | 1.04 | 0.12 |
| <b>RS8_HUMAN</b>                               | (P62241) 40S ribosomal protein S8                                                                    | 4 | 1.04 | 0.08 |
| <b>RS27_HUMAN</b>                              | (P42677) 40S ribosomal protein S27<br>(Metallopan-stimulin 1, MPS-1)                                 | 1 | 1.05 | N/A  |
| <b>RL32_HUMAN</b>                              | (P62910) 60S ribosomal protein L32                                                                   | 1 | 1.05 | N/A  |
| <b>SGPL1_HUMAN</b>                             | (O95470) Sphingosine-1-phosphate lyase 1 (EC 4.1.2.27)<br>(SP-lyase) (hSPL)                          | 1 | 1.05 | N/A  |
| <b>RL4_HUMAN</b>                               | (P36578) 60S ribosomal protein L4 (L1)                                                               | 5 | 1.05 | 0.08 |
| <b>TACC1_HUMAN</b>                             | (O75410) Transforming acidic coiled-coil-containing<br>protein 1 (Taxin 1)                           | 1 | 1.05 | N/A  |
| <b>YBOX1_HUMAN</b>                             | (P67809) Nuclease sensitive element binding protein 1<br>(Y-box binding protein-1)                   | 2 | 1.05 | 0.02 |
| <b>COPB_HUMAN</b>                              | (P53618) Coatomer beta subunit (Beta-coat protein)<br>(Beta-COP)                                     | 1 | 1.05 | N/A  |
| <b>SYI_HUMAN</b>                               | (P41252) Isoleucyl-tRNA synthetase, cytoplasmic (EC<br>6.1.1.5) (Isoleucine--tRNA ligase) (IleRS)    | 8 | 1.05 | 0.17 |
| <b>ANXA2_HUMAN</b>                             | (P07355) Annexin A2 (Annexin II) (Lipocortin II)<br>(Calpactin I heavy chain) (Chromobindin 8) (p36) | 9 | 1.05 | 0.07 |
| <b>CISY_HUMAN</b>                              | (O75390) Citrate synthase, mitochondrial precursor (EC<br>2.3.3.1)                                   | 1 | 1.05 | N/A  |
| <b>PRPU_HUMAN</b>                              | (O94906) U5 snRNP-associated 102 kDa protein (U5-102<br>kDa protein)                                 | 1 | 1.05 | N/A  |
| <b>ATP5L_HUMAN</b>                             | (O75964) ATP synthase g chain, mitochondrial<br>(EC 3.6.3.14) (ATPase subunit G)                     | 1 | 1.05 | N/A  |

|                    |                                                                                                        |   |      |      |
|--------------------|--------------------------------------------------------------------------------------------------------|---|------|------|
| <b>BASP_HUMAN</b>  | (P80723) Brain acid soluble protein 1<br>(BASP1 protein) (Neuronal axonal membrane protein<br>NAP-22)  | 3 | 1.06 | 0.11 |
| <b>FAS_HUMAN</b>   | (P49327) Fatty acid synthase (EC 2.3.1.85)                                                             | 9 | 1.06 | 0.16 |
| <b>Y0143_HUMAN</b> | (Q14156) Hypothetical protein KIAA0143 (Fragment)                                                      | 6 | 1.06 | 0.11 |
| <b>PSD1_HUMAN</b>  | (Q99460) 26S proteasome non-ATPase regulatory subunit<br>1 (26S proteasome regulatory subunit RPN2)    | 1 | 1.06 | N/A  |
| <b>IPO9_HUMAN</b>  | (Q96P70) Importin-9 (Imp9) (Ran-binding protein 9)<br>(RanbP9)                                         | 2 | 1.06 | 0.08 |
| <b>H15_HUMAN</b>   | (P16401) Histone H1.5 (Histone H1a)                                                                    | 4 | 1.06 | 0.07 |
| <b>ASPH_HUMAN</b>  | (Q12797) Aspartyl/asparaginyl beta-hydroxylase (EC<br>1.14.11.16) (Aspartate beta-hydroxylase)         | 3 | 1.06 | 0.20 |
| <b>DDX48_HUMAN</b> | (P38919) Probable ATP-dependent helicase DDX48<br>(DEAD-box protein 48) (Eukaryotic initiation factor) | 1 | 1.06 | N/A  |
| <b>NUCL_HUMAN</b>  | (P19338) Nucleolin (Protein C23)                                                                       | 8 | 1.06 | 0.09 |
| <b>FER_HUMAN</b>   | (P16591) Proto-oncogene tyrosine-protein kinase FER (EC<br>2.7.1.112) (p94-FER) (c-FER)                | 1 | 1.06 | N/A  |
| <b>ZFP91_HUMAN</b> | (Q96JP5) Zinc finger protein 91 homolog (Zfp-91)<br>(FKSG11 protein)                                   | 1 | 1.06 | N/A  |
| <b>HNRPQ_HUMAN</b> | (O60506) Heterogeneous nuclear ribonucleoprotein Q<br>(hnRNP-Q)                                        | 2 | 1.06 | 0.07 |
| <b>TCPH_HUMAN</b>  | (Q99832) T-complex protein 1, eta subunit (TCP-1-eta)<br>(CCT-eta) (HIV-1 Nef interacting protein)     | 8 | 1.06 | 0.16 |
| <b>BZRP_HUMAN</b>  | (P30536) Peripheral-type benzodiazepine receptor (PBR)                                                 | 2 | 1.06 | 0.17 |
| <b>PRDX3_HUMAN</b> | (P30048) Thioredoxin-dependent peroxide reductase,<br>mitochondrial precursor (EC 1.11.1.15)           | 2 | 1.06 | 0.10 |
| <b>ATPB_HUMAN</b>  | (P06576) ATP synthase beta chain, mitochondrial<br>precursor (EC 3.6.3.14)                             | 8 | 1.06 | 0.11 |
| <b>RAB14_HUMAN</b> | (P61106) Ras-related protein Rab-14                                                                    | 2 | 1.07 | 0.19 |
| <b>AT1A1_HUMAN</b> | (P05023) Sodium/potassium-transporting ATPase alpha-1                                                  | 3 | 1.07 | 0.17 |

|                    |                                                                                                     |   |      |      |
|--------------------|-----------------------------------------------------------------------------------------------------|---|------|------|
|                    | chainprecursor (EC 3.6.3.9)                                                                         |   |      |      |
| <b>AKAP2_HUMAN</b> | (Q9Y2D5) A-kinase anchor protein 2 (Protein kinase A anchoring protein 2) (PRKA2) (AKAP-2)          | 2 | 1.07 | 0.08 |
| <b>CAP1_HUMAN</b>  | (Q01518) Adenylyl cyclase-associated protein 1 (CAP 1)                                              | 2 | 1.07 | 0.05 |
| <b>HNRPR_HUMAN</b> | (O43390) Heterogeneous nuclear ribonucleoprotein R (hnRNP R)                                        | 5 | 1.07 | 0.17 |
| <b>PLD1_HUMAN</b>  | (Q13393) Phospholipase D1 (EC 3.1.4.4) (PLD 1)                                                      | 1 | 1.07 | N/A  |
| <b>K2C1_HUMAN</b>  | (P04264) Keratin, type II cytoskeletal 1 (Cytokeratin 1, CK 1)                                      | 3 | 1.07 | 0.11 |
| <b>KC1G3_HUMAN</b> | (Q9Y6M4) Casein kinase I, gamma 3 isoform (EC 2.7.1.-) (CKI-gamma 3)                                | 4 | 1.08 | 0.15 |
| <b>TIM44_HUMAN</b> | (O43615) Import inner membrane translocase subunit TIM44                                            | 2 | 1.08 | 0.18 |
| <b>RENH_HUMAN</b>  | (O75787) Renin receptor precursor (Renin/prorenin receptor)                                         | 2 | 1.08 | 0.04 |
| <b>UBIQ_HUMAN</b>  | (P62988) Ubiquitin                                                                                  | 4 | 1.08 | 0.12 |
| <b>NDKB_HUMAN</b>  | (P22392) Nucleoside diphosphate kinase B (EC 2.7.4.6)                                               | 4 | 1.08 | 0.04 |
| <b>SSRD_HUMAN</b>  | (P51571) Translocon-associated protein delta subunit precursor (TRAP-delta) (Signal sequence recept | 1 | 1.08 | N/A  |
| <b>FRIH_HUMAN</b>  | (P02794) Ferritin heavy chain (EC 1.16.3.1)                                                         | 4 | 1.08 | 0.21 |
| <b>RS3A_HUMAN</b>  | (P61247) 40S ribosomal protein S3a                                                                  | 2 | 1.08 | 0.03 |
| <b>IDHC_HUMAN</b>  | (O75874) Isocitrate dehydrogenase [NADP] cytoplasmic (EC 1.1.1.42)                                  | 1 | 1.08 | N/A  |
| <b>EPHA2_HUMAN</b> | (P29317) Ephrin type-A receptor 2 precursor (EC 2.7.1.112)                                          | 2 | 1.08 | 0.09 |
| <b>LEG1_HUMAN</b>  | (P09382) Galectin-1 (Beta-galactoside-binding lectin L-14-I)                                        | 3 | 1.08 | 0.08 |
| <b>SF3B1_HUMAN</b> | (O75533) Splicing factor 3B subunit 1 (Spliceosome associated protein 155)                          | 4 | 1.08 | 0.06 |
| <b>SERA_HUMAN</b>  | (O43175) D-3-phosphoglycerate dehydrogenase (EC                                                     | 2 | 1.08 | 0.09 |

---

|                    |                                                                                                    |   |      |      |
|--------------------|----------------------------------------------------------------------------------------------------|---|------|------|
|                    | 1.1.1.95) (3-PGDH)                                                                                 |   |      |      |
| <b>NUP93_HUMAN</b> | (Q8N1F7) Nuclear pore complex protein Nup93<br>(Nucleoporin Nup93)                                 | 1 | 1.08 | N/A  |
| <b>ALDOA_HUMAN</b> | (P04075) Fructose-bisphosphate aldolase A (EC 4.1.2.13)<br>(Muscle-type aldolase                   | 6 | 1.09 | 0.21 |
| <b>VATO_HUMAN</b>  | (Q99437) Vacuolar ATP synthase 21 kDa proteolipid<br>subunit (EC 3.6.3.14) (HATPL)                 | 1 | 1.09 | N/A  |
| <b>APMAP_HUMAN</b> | (Q9HDC9) Adipocyte plasma membrane-associated<br>protein (BSCv protein)                            | 3 | 1.09 | 0.17 |
| <b>ELOC_HUMAN</b>  | (Q15369) Transcription elongation factor B polypeptide 1                                           | 1 | 1.09 | N/A  |
| <b>RL23A_HUMAN</b> | (P62750) 60S ribosomal protein L23a                                                                | 5 | 1.09 | 0.13 |
| <b>SAHH_HUMAN</b>  | (P23526) Adenosylhomocysteinase (EC 3.3.1.1) (S-<br>adenosyl-L-homocysteine hydrolase) (AdoHcyase) | 2 | 1.09 | 0.12 |
| <b>S12A2_HUMAN</b> | (P55011) Solute carrier family 12, member 2                                                        | 1 | 1.09 | N/A  |
| <b>GNAI1_HUMAN</b> | (P63096) Guanine nucleotide-binding protein G, alpha-1<br>subunit                                  | 7 | 1.09 | 0.14 |
| <b>LDHB_HUMAN</b>  | (P07195) L-lactate dehydrogenase B chain (EC<br>1.1.1.27)(LDH-B) (LDH heart subunit) (LDH-H)       | 5 | 1.10 | 0.12 |
| <b>TERA_HUMAN</b>  | (P55072) Transitional endoplasmic reticulum ATPase<br>(TER ATPase) (15S Mg(2+)-ATPase p97 subunit) | 8 | 1.10 | 0.19 |
| <b>PI4KA_HUMAN</b> | (P42356) Phosphatidylinositol 4-kinase alpha<br>(EC 2.7.1.67) (PI4-kinase) (PtdIns-4-kinase)       | 3 | 1.10 | 0.19 |
| <b>IF3A_HUMAN</b>  | (Q14152) Eukaryotic translation initiation factor 3<br>subunit10 (eIF-3 theta) (eIF3 p167)         | 4 | 1.10 | 0.10 |
| <b>VPP1_HUMAN</b>  | (Q93050) Vacuolar proton translocating ATPase 116 kDa<br>subunit a isoform 1                       | 3 | 1.10 | 0.07 |
| <b>SNP23_HUMAN</b> | (O00161) Synaptosomal-associated protein 23 (SNAP-23)<br>(Vesicle-membrane fusion protein SNAP-23) | 5 | 1.10 | 0.03 |
| <b>PRP8_HUMAN</b>  | (Q6P2Q9) Pre-mRNA processing splicing factor 8<br>(Splicing factor Prp8) (PRP8 homolog)            | 4 | 1.10 | 0.21 |

---

|                    |                                                                                                   |    |      |      |
|--------------------|---------------------------------------------------------------------------------------------------|----|------|------|
| <b>TXD10_HUMAN</b> | (Q96JJ7) Protein disulfide-isomerase TXNDC10 precursor<br>(EC 5.3.4.1)                            | 1  | 1.11 | N/A  |
| <b>RS24_HUMAN</b>  | (P62847) 40S ribosomal protein S24                                                                | 3  | 1.11 | 0.11 |
| <b>IF5A_HUMAN</b>  | (P63241) Eukaryotic translation initiation factor 5A<br>(eIF-5A) (eIF-4D) (Rev-binding factor)    | 1  | 1.11 | N/A  |
| <b>FYN_HUMAN</b>   | (P06241) Proto-oncogene tyrosine-protein kinase FYN<br>(EC 2.7.1.112) (P59-FYN) (SYN #2515) (SLK) | 1  | 1.11 | N/A  |
| <b>YES_HUMAN</b>   | (P07947) Proto-oncogene tyrosine-protein kinase YES<br>(EC 2.7.1.112) (p61-YES) (C-YES)           | 1  | 1.11 | N/A  |
| <b>LYN_HUMAN</b>   | (P07948) Tyrosine-protein kinase Lyn<br>(EC 2.7.1.112)                                            | 1  | 1.11 | N/A  |
| <b>PDE3A_HUMAN</b> | (Q14432) cGMP-inhibited 3',5'-cyclic phosphodiesterase<br>A (EC 3.1.4.17)                         | 1  | 1.11 | N/A  |
| <b>NONO_HUMAN</b>  | (Q15233) Non-POU domain-containing octamer-binding<br>protein (NonO protein)                      | 1  | 1.12 | N/A  |
| <b>K2C8_HUMAN</b>  | (P05787) Keratin, type II cytoskeletal 8 (Cytokeratin 8,<br>CK 8)                                 | 8  | 1.12 | 0.14 |
| <b>GNA13_HUMAN</b> | (Q14344) Guanine nucleotide-binding protein, alpha-13<br>subunit (G alpha 13)                     | 3  | 1.12 | 0.03 |
| <b>LAMP1_HUMAN</b> | (P11279) Lysosome-associated membrane glycoprotein 1<br>precursor (LAMP-1) (CD107a antigen)       | 1  | 1.12 | N/A  |
| <b>AHNK_HUMAN</b>  | (Q09666) Neuroblast differentiation associated protein<br>AHNAK (Desmoyokin) (Fragments)          | 24 | 1.12 | 0.17 |
| <b>RT31_HUMAN</b>  | (Q92665) 28S ribosomal protein S31, mitochondrial<br>precursor S31mt) (MRP-S31) (Imogen 38)       | 1  | 1.12 | N/A  |
| <b>FLNB_HUMAN</b>  | (O75369) Filamin B (FLN-B) (Beta-filamin) (Actin-<br>binding-like protein) (Thyroid autoantigen)  | 7  | 1.12 | 0.19 |
| <b>KTN1_HUMAN</b>  | (Q86UP2) Kinectin (Kinesin receptor) (CG-1 antigen)                                               | 3  | 1.12 | 0.22 |
| <b>RAB13_HUMAN</b> | (P51153) Ras-related protein Rab-13                                                               | 2  | 1.12 | 0.14 |
| <b>VATB2_HUMAN</b> | (P21281) Vacuolar ATP synthase subunit B, brain isoform                                           | 5  | 1.13 | 0.05 |

|                    |                                                                                                        |   |      |      |
|--------------------|--------------------------------------------------------------------------------------------------------|---|------|------|
|                    | (EC 3.6.3.14) (V-ATPase B2 subunit)                                                                    |   |      |      |
| <b>LPPRC_HUMAN</b> | (P42704) 130 kDa leucine-rich protein (LRP 130) (GP130)<br>(Leucine-rich PPR-motif containing protein) | 7 | 1.13 | 0.21 |
| <b>TTC11_HUMAN</b> | (Q9Y3D6) Tetratricopeptide repeat protein 11 (TPR repeat protein 11) (Fis1 homolog)                    | 1 | 1.13 | N/A  |
| <b>VAMP2_HUMAN</b> | (P63027) Vesicle-associated membrane protein 2 (VAMP-2) (Synaptobrevin-2)                              | 1 | 1.13 | N/A  |
| <b>K2C7_HUMAN</b>  | (P08729) Keratin, type II cytoskeletal 7 (Cytokeratin 7, CK 7) (Sarcolectin)                           | 3 | 1.13 | 0.18 |
| <b>ITB1_HUMAN</b>  | (P05556) Integrin beta-1 precursor (Fibronectin receptor beta subunit) (CD29 antigen)                  | 2 | 1.13 | 0.11 |
| <b>AP2M1_HUMAN</b> | (Q96CW1) Clathrin coat assembly protein AP50 (Clathrin coat associated protein AP50)                   | 1 | 1.13 | N/A  |
| <b>TCPA_HUMAN</b>  | (P17987) T-complex protein 1, alpha subunit (TCP-1-alpha)                                              | 6 | 1.14 | 0.12 |
| <b>THOC4_HUMAN</b> | (Q86V81) THO complex subunit 4 (Tho4) (Ally of AML-1 and LEF-1)                                        | 1 | 1.14 | N/A  |
| <b>P24_HUMAN</b>   | (Q15363) Cop-coated vesicle membrane protein p24 precursor (p24A)                                      | 2 | 1.14 | 0.09 |
| <b>TPIS_HUMAN</b>  | (P60174) Triosephosphate isomerase (EC 5.3.1.1) (TIM)                                                  | 2 | 1.14 | 0.05 |
| <b>CD36_HUMAN</b>  | (P16671) Platelet glycoprotein IV (GPIV) (Glycoprotein IIIb) (GPIIIB)                                  | 1 | 1.14 | N/A  |
| <b>RL3_HUMAN</b>   | (P39023) 60S ribosomal protein L3 (HIV-1 TAR RNA binding protein B) (TARBP-B)                          | 4 | 1.14 | 0.13 |
| <b>RER1_HUMAN</b>  | (O15258) RER1 protein                                                                                  | 3 | 1.14 | 0.08 |
| <b>PSB2_HUMAN</b>  | (P49721) Proteasome subunit beta type 2<br>(EC 3.4.25.1) (Proteasome component C7-I)                   | 1 | 1.14 | N/A  |
| <b>N2DL3_HUMAN</b> | (Q9BZM4) NKG2D ligand 3 precursor (NKG2D ligand 3) (NKG2DL3) (N2DL-3) (ALCAN-gamma)                    | 1 | 1.14 | N/A  |
| <b>COF1_HUMAN</b>  | (P23528) Cofilin-1 (Cofilin, non-muscle isoform) (p18)                                                 | 2 | 1.14 | 0.16 |

|                    |                                                                                             |   |      |      |
|--------------------|---------------------------------------------------------------------------------------------|---|------|------|
| <b>AMPN_HUMAN</b>  | (P15144) Aminopeptidase N (EC 3.4.11.2) (hAPN)<br>(Alanyl aminopeptidase)                   | 2 | 1.14 | 0.18 |
| <b>VATH_HUMAN</b>  | (Q9UI12) Vacuolar ATP synthase subunit H<br>(EC 3.6.3.14) (V-ATPase H subunit)              | 2 | 1.14 | 0.06 |
| <b>STMN1_HUMAN</b> | (P16949) Stathmin (Phosphoprotein p19) (pp19)<br>(Oncoprotein 8) (Op18)                     | 1 | 1.14 | N/A  |
| <b>NDKA_HUMAN</b>  | (P15531) Nucleoside diphosphate kinase A<br>(EC 2.7.4.6) (NDK A) (NDP kinase A)             | 3 | 1.14 | 0.04 |
| <b>VPP2_HUMAN</b>  | (Q9Y487) Vacuolar proton translocating ATPase 116 kDa<br>subunit a isoform 2                | 4 | 1.14 | 0.22 |
| <b>PRS6A_HUMAN</b> | (P17980) 26S protease regulatory subunit 6A (TAT-<br>binding protein 1) (TBP-1)             | 2 | 1.14 | 0.10 |
| <b>TIM23_HUMAN</b> | (O14925) Mitochondrial import inner membrane<br>translocase subunit Tim23                   | 1 | 1.15 | N/A  |
| <b>CYB5_HUMAN</b>  | (P00167) Cytochrome b5                                                                      | 3 | 1.15 | 0.20 |
| <b>CASP_HUMAN</b>  | (O75718) Cartilage-associated protein precursor                                             | 2 | 1.15 | 0.02 |
| <b>PRDX1_HUMAN</b> | (Q06830) Peroxiredoxin 1 (EC 1.11.1.15) (Thioredoxin<br>peroxidase 2)                       | 3 | 1.15 | 0.18 |
| <b>DYHC_HUMAN</b>  | (Q14204) Dynein heavy chain, cytosolic (DYHC)<br>(Cytoplasmic dynein heavy chain 1) (DHC1)  | 7 | 1.15 | 0.16 |
| <b>GBG5L_HUMAN</b> | (Q9Y3K8) Guanine nucleotide-binding protein<br>G(I)/G(S)/G(O) gamma-5-like subunit          | 1 | 1.15 | N/A  |
| <b>RL29_HUMAN</b>  | (P47914) 60S ribosomal protein L29 (Cell surface heparin<br>binding protein HIP)            | 3 | 1.15 | 0.21 |
| <b>VATF_HUMAN</b>  | (Q16864) Vacuolar ATP synthase subunit F (EC 3.6.3.14)<br>(V-ATPase F subunit)              | 1 | 1.15 | N/A  |
| <b>RUVB1_HUMAN</b> | (Q9Y265) RuvB-like 1 (EC 3.6.1.-) (49-kDa TATA box-<br>binding protein-interacting protein) | 4 | 1.15 | 0.19 |
| <b>RL35_HUMAN</b>  | (P42766) 60S ribosomal protein L35                                                          | 4 | 1.15 | 0.07 |
| <b>SSRA_HUMAN</b>  | (P43307) Translocon-associated protein alpha subunit                                        | 1 | 1.15 | N/A  |



|                    |                                                                                                     |    |      |      |
|--------------------|-----------------------------------------------------------------------------------------------------|----|------|------|
|                    | precursor (TRAP-alpha)                                                                              |    |      |      |
| <b>ATPA_HUMAN</b>  | (P25705) ATP synthase alpha chain, mitochondrial precursor (EC 3.6.3.14)                            | 6  | 1.15 | 0.09 |
| <b>IF2G_HUMAN</b>  | (P41091) Eukaryotic translation initiation factor 2 subunit 3                                       | 1  | 1.16 | N/A  |
| <b>RRBP1_HUMAN</b> | (Q9P2E9) Ribosome-binding protein 1 (Ribosome receptor protein) (180 kDa ribosome receptor homolog) | 2  | 1.16 | 0.04 |
| <b>GBG11_HUMAN</b> | (P61952) Guanine nucleotide-binding protein G(I)/G(S)/G(O) gamma-11 subunit                         | 2  | 1.16 | 0.11 |
| <b>ADAS_HUMAN</b>  | (O00116) Alkyldihydroxyacetonephosphate synthase, peroxisomal precursor (EC 2.5.1.26)               | 1  | 1.16 | N/A  |
| <b>SEPT6_HUMAN</b> | (Q14141) Septin-6                                                                                   | 1  | 1.16 | N/A  |
| <b>EZRI_HUMAN</b>  | (P15311) Ezrin (p81) (Cytovillin) (Villin 2)                                                        | 3  | 1.16 | 0.21 |
| <b>AT11C_HUMAN</b> | (Q8NB49) Potential phospholipid-transporting ATPase IG (EC 3.6.3.1) (ATPase class I type 11C)       | 1  | 1.16 | N/A  |
| <b>M2OM_HUMAN</b>  | (Q02978) Mitochondrial 2-oxoglutarate/malate carrier protein (OGCP)                                 | 2  | 1.16 | 0.02 |
| <b>PP4R1_HUMAN</b> | (Q8TF05) Serine/threonine phosphatase 4 regulatory subunit 1                                        | 1  | 1.16 | N/A  |
| <b>SFXN1_HUMAN</b> | (Q9H9B4) Sideroflexin 1                                                                             | 3  | 1.17 | 0.20 |
| <b>CALM_HUMAN</b>  | (P62158) Calmodulin (CaM)                                                                           | 2  | 1.17 | 0.04 |
| <b>PSB3_HUMAN</b>  | (P49720) Proteasome subunit beta type 3 (EC 3.4.25.1)(Proteasome theta chain)                       | 6  | 1.17 | 0.22 |
| <b>CH10_HUMAN</b>  | (P61604) 10 kDa heat shock protein, mitochondrial (Hsp10) (10 kDa chaperonin) (CPN10)               | 3  | 1.17 | 0.03 |
| <b>K6PF_HUMAN</b>  | (P08237) 6-phosphofructokinase, muscle type (EC 2.7.1.11) (Phosphofructokinase 1)                   | 3  | 1.17 | 0.16 |
| <b>VATA1_HUMAN</b> | (P38606) Vacuolar ATP synthase catalytic subunit A, ubiquitous isoform (EC 3.6.3.14) (V-ATPase A su | 10 | 1.17 | 0.18 |
| <b>PSB1_HUMAN</b>  | (P20618) Proteasome subunit beta type 1                                                             | 1  | 1.17 | N/A  |

|                        |                                                                                                        |   |      |      |
|------------------------|--------------------------------------------------------------------------------------------------------|---|------|------|
|                        | (EC 3.4.25.1) (Proteasome component C5)                                                                |   |      |      |
| <b>SRP68_HUMAN</b>     | (Q9UHB9) Signal recognition particle 68 kDa protein<br>(SRP68)                                         | 1 | 1.17 | N/A  |
| <b>AT2A2_HUMAN</b>     | (P16615) Sarcoplasmic/endoplasmic reticulum calcium<br>ATPase 2 (EC 3.6.3.8) (Calcium pump 2) (SERCA2) | 4 | 1.18 | 0.17 |
| <b>MOT4_HUMAN</b>      | (O15427) Monocarboxylate transporter 4                                                                 | 1 | 1.18 | N/A  |
| <b>SURF4_HUMAN</b>     | (O15260) Surfeit locus protein 4                                                                       | 4 | 1.18 | 0.08 |
| <b>NNTM_HUMAN</b>      | (Q13423) NAD(P) transhydrogenase, mitochondrial<br>precursor (EC 1.6.1.2)                              | 3 | 1.18 | 0.03 |
| <b>RS16_HUMAN</b>      | (P62249) 40S ribosomal protein S16                                                                     | 4 | 1.18 | 0.09 |
| <b>VATD_HUMAN</b>      | (Q9Y5K8) Vacuolar ATP synthase subunit D<br>(EC 3.6.3.14) (V-ATPase D subunit)                         | 3 | 1.18 | 0.08 |
| <b>MYO1C_HUMA</b><br>N | (O00159) Myosin Ic (Myosin I beta) (MMI-beta)                                                          | 1 | 1.18 | N/A  |
| <b>PPIA_HUMAN</b>      | (P62937) Peptidyl-prolyl cis-trans isomerase A<br>(EC 5.2.1.8) (PPIase) (Rotamase) (Cyclophilin A)     | 3 | 1.18 | 0.08 |
| <b>DDX23_HUMAN</b>     | (Q9BUQ8) Probable ATP-dependent RNA helicase<br>DDX23 (EC 3.6.1.-) (DEAD-box protein 23)               | 1 | 1.18 | N/A  |
| <b>ECHB_HUMAN</b>      | (P55084) Trifunctional enzyme beta subunit,<br>mitochondrial precursor (TP-beta)                       | 2 | 1.18 | 0.01 |
| <b>TXNDC_HUMAN</b>     | (Q9H3N1) Thioredoxin domain containing protein 1<br>precursor (Transmembrane Trx-related protein)      | 1 | 1.18 | N/A  |
| <b>RL30_HUMAN</b>      | (P62888) 60S ribosomal protein L30                                                                     | 2 | 1.19 | 0.03 |
| <b>ACLY_HUMAN</b>      | (P53396) ATP-citrate synthase (EC 2.3.3.8) (ATP-citrate<br>(pro-S)-lyase) (Citrate cleavage enzyme)    | 9 | 1.19 | 0.11 |
| <b>ECM29_HUMAN</b>     | (Q5VYK3) Proteasome-associated protein ECM29<br>homolog (Ecm29)                                        | 3 | 1.19 | 0.19 |
| <b>RAP2B_HUMAN</b>     | (P61225) Ras-related protein Rap-2b                                                                    | 2 | 1.19 | 0.17 |
| <b>RAP2A_HUMAN</b>     | (P10114) Ras-related protein Rap-2a (RbBP-30)                                                          | 2 | 1.19 | 0.17 |
| <b>XRP2_HUMAN</b>      | (O75695) XRP2 protein                                                                                  | 3 | 1.19 | 0.04 |

|                    |                                                                                                   |    |      |      |
|--------------------|---------------------------------------------------------------------------------------------------|----|------|------|
| <b>VA0D_HUMAN</b>  | (P61421) Vacuolar ATP synthase subunit d<br>(EC 3.6.3.14) (V-ATPase d subunit)                    | 10 | 1.19 | 0.21 |
| <b>CAND1_HUMAN</b> | (Q86VP6) Cullin-associated NEDD8-dissociated protein 1                                            | 6  | 1.19 | 0.19 |
| <b>SNRPA_HUMAN</b> | (P09012) U1 small nuclear ribonucleoprotein A (U1 snRNP protein A)                                | 1  | 1.19 | N/A  |
| <b>PSA5_HUMAN</b>  | (P28066) Proteasome subunit alpha type 5 (EC 3.4.25.1)<br>(Proteasome zeta chain)                 | 3  | 1.19 | 0.22 |
| <b>GHITM_HUMAN</b> | (Q9H3K2) Growth hormone inducible transmembrane protein (Dermal papilla derived protein 2)        | 3  | 1.19 | 0.17 |
| <b>SPC25_HUMAN</b> | (Q15005) Microsomal signal peptidase 25 kDa subunit<br>(EC 3.4.-.-) (SPase 25 kDa subunit)        | 1  | 1.20 | N/A  |
| <b>NB7M_HUMAN</b>  | (O95139) NADH-ubiquinone oxidoreductase B17 subunit<br>(EC 1.6.5.3) (EC 1.6.99.3) (Complex I-B17) | 1  | 1.20 | N/A  |
| <b>RASH_HUMAN</b>  | (P01112) Transforming protein p21/H-Ras-1<br>(c-H-ras)                                            | 1  | 1.20 | N/A  |
| <b>CLUS_HUMAN</b>  | (P10909) Clusterin precursor (Complement-associated protein SP-40,40)                             | 1  | 1.20 | N/A  |
| <b>RALA_HUMAN</b>  | (P11233) Ras-related protein Ral-A                                                                | 2  | 1.20 | 0.01 |
| <b>SC61B_HUMAN</b> | (P60468) Protein transport protein Sec61 beta subunit                                             | 2  | 1.21 | 0.04 |
| <b>PSA4_HUMAN</b>  | (P25789) Proteasome subunit alpha type 4 (EC 3.4.25.1)<br>(Proteasome component C9)               | 3  | 1.21 | 0.16 |
| <b>EF1B_HUMAN</b>  | (P24534) Elongation factor 1-beta (EF-1-beta)                                                     | 3  | 1.21 | 0.21 |
| <b>FKBP8_HUMAN</b> | (Q14318) 38 kDa FK-506 binding protein homolog<br>(FKBPR38) (FK506-binding protein 8)             | 1  | 1.21 | N/A  |
| <b>MOES_HUMAN</b>  | (P26038) Moesin (Membrane-organizing extension spike protein)                                     | 5  | 1.21 | 0.23 |
| <b>TI17A_HUMAN</b> | (Q99595) Mitochondrial import inner membrane translocase subunit Tim17 A                          | 1  | 1.21 | N/A  |
| <b>GALT2_HUMAN</b> | (Q10471) Polypeptide N-acetylgalactosaminyltransferase<br>2 (EC 2.4.1.41)                         | 2  | 1.21 | 0.13 |

|                    |                                                                                                    |   |      |      |
|--------------------|----------------------------------------------------------------------------------------------------|---|------|------|
| <b>RAP1A_HUMAN</b> | (P62834) Ras-related protein Rap-1A (GTP-binding protein smg-p21A) (Ras-related protein Krev-1)    | 4 | 1.21 | 0.17 |
| <b>NU205_HUMAN</b> | (Q92621) Nuclear pore complex protein Nup205 (Nucleoporin Nup205) (205 kDa nucleoporin)            | 2 | 1.21 | 0.11 |
| <b>ACPH_HUMAN</b>  | (P13798) Acylamino-acid-releasing enzyme (EC 3.4.19.1) (AARE) (Acyl-peptide hydrolase) (APH #1833) | 1 | 1.22 | N/A  |
| <b>SC221_HUMAN</b> | (O75396) Vesicle trafficking protein SEC22b (SEC22 vesicle trafficking protein-like 1)             | 2 | 1.22 | 0.08 |
| <b>PRDX5_HUMAN</b> | (P30044) Peroxiredoxin 5, mitochondrial precursor (EC 1.11.1.15) (Prx-V)                           | 2 | 1.22 | 0.24 |
| <b>NU2M_HUMAN</b>  | (P03891) NADH-ubiquinone oxidoreductase chain 2 (EC 1.6.5.3) (NADH dehydrogenase subunit 2)        | 1 | 1.22 | N/A  |
| <b>LYRIC_HUMAN</b> | (Q86UE4) LYRIC protein (Lysine-rich CEACAM1 co-isolated protein) (3D3/lyric)                       | 2 | 1.22 | 0.17 |
| <b>K6PP_HUMAN</b>  | (Q01813) 6-phosphofructokinase, type C (EC 2.7.1.11) (Phosphofructokinase 1)                       | 3 | 1.22 | 0.17 |
| <b>IPO4_HUMAN</b>  | (Q8TEX9) Importin-4 (Importin 4b) (Imp4b) (Ran-binding protein 4) (RanBP4)                         | 2 | 1.22 | 0.02 |
| <b>COX1_HUMAN</b>  | (P00395) Cytochrome c oxidase subunit 1 (EC 1.9.3.1) (Cytochrome c oxidase polypeptide I)          | 1 | 1.22 | N/A  |
| <b>EI2BG_HUMAN</b> | (Q9NR50) Translation initiation factor eIF-2B gamma subunit (eIF-2B GDP-GTP exchange factor)       | 1 | 1.22 | N/A  |
| <b>ALP_HUMAN</b>   | (Q9H0A0) N-acetyltransferase-like protein (EC 2.3.1.-)                                             | 2 | 1.22 | 0.08 |
| <b>LA_HUMAN</b>    | (P05455) Lupus La protein (Sjogren syndrome type B antigen) (SS-B) (La ribonucleoprotein)          | 2 | 1.22 | 0.04 |
| <b>COX6C_HUMAN</b> | (P09669) Cytochrome c oxidase polypeptide VIc precursor (EC 1.9.3.1)                               | 2 | 1.23 | 0.16 |
| <b>AUP1_HUMAN</b>  | (Q9Y679) Ancient ubiquitous protein 1 precursor                                                    | 1 | 1.23 | N/A  |

|                     |                                                                                                     |    |      |      |
|---------------------|-----------------------------------------------------------------------------------------------------|----|------|------|
| <b>ABCB7_HUMAN</b>  | (O75027) ATP-binding cassette, sub-family B, member 7, mitochondrial precursor                      | 1  | 1.23 | N/A  |
| <b>AAAT_HUMAN</b>   | (Q15758) Neutral amino acid transporter B(0) (ATB(0))                                               | 1  | 1.23 | N/A  |
| <b>U520_HUMAN</b>   | (O75643) U5 small nuclear ribonucleoprotein 200 kDa helicase (EC 3.6.1.-)                           | 2  | 1.23 | 0.13 |
| <b>TOM22_HUMAN</b>  | (Q9NS69) Mitochondrial import receptor subunit TOM22 homolog                                        | 3  | 1.23 | 0.04 |
| <b>COX41_HUMAN</b>  | (P13073) Cytochrome c oxidase subunit IV isoform 1, mitochondrial precursor (EC 1.9.3.1) (COX IV-1) | 2  | 1.23 | 0.14 |
| <b>MYOF_HUMAN</b>   | (Q9NZM1) Myoferlin (Fer-1 like protein 3)                                                           | 3  | 1.24 | 0.05 |
| <b>SYM_HUMAN</b>    | (P56192) Methionyl-tRNA synthetase (EC 6.1.1.10) (Methionine--tRNA ligase) (MetRS)                  | 1  | 1.24 | N/A  |
| <b>YME1L1_HUMAN</b> | (Q96TA2) ATP-dependent metalloprotease YME1L1 (EC 3.4.24.-) (YME1-like protein 1)                   | 1  | 1.24 | N/A  |
| <b>MPRI_HUMAN</b>   | (P11717) Cation-independent mannose-6-phosphate receptor precursor (CI Man-6-P receptor) (CI-MPR)   | 1  | 1.24 | N/A  |
| <b>PRS8_HUMAN</b>   | (P62195) 26S protease regulatory subunit 8 (Proteasome subunit p45) (p45/SUG)                       | 2  | 1.24 | 0.21 |
| <b>RS5_HUMAN</b>    | (P46782) 40S ribosomal protein S5                                                                   | 1  | 1.24 | N/A  |
| <b>CND1_HUMAN</b>   | (Q15021) Condensin subunit 1 (Chromosome condensation-related SMC-associated protein 1)             | 2  | 1.24 | 0.05 |
| <b>RAB8A_HUMAN</b>  | (P61006) Ras-related protein Rab-8A (Oncogene c-mel)                                                | 4  | 1.24 | 0.14 |
| <b>MTCH2_HUMAN</b>  | (Q9Y6C9) Mitochondrial carrier homolog 2 (Met-induced mitochondrial protein)                        | 1  | 1.24 | N/A  |
| <b>RL5_HUMAN</b>    | (P46777) 60S ribosomal protein L5                                                                   | 3  | 1.25 | 0.16 |
| <b>CD9_HUMAN</b>    | (P21926) CD9 antigen (p24) (Leukocyte antigen MIC3) (Motility-related protein) (MRP-1)              | 2  | 1.25 | 0.15 |
| <b>CSE1_HUMAN</b>   | (P55060) Importin-alpha re-exporter (Chromosome segregation1-like protein)                          | 11 | 1.25 | 0.13 |
| <b>CAPZB_HUMAN</b>  | (P47756) F-actin capping protein beta subunit (CapZ)                                                | 1  | 1.25 | N/A  |

|                    | beta)                                                                                            |   |      |      |
|--------------------|--------------------------------------------------------------------------------------------------|---|------|------|
| <b>LAM1_HUMAN</b>  | (P20700) Lamin B1                                                                                | 2 | 1.25 | 0.02 |
| <b>PTH2_HUMAN</b>  | (Q9Y3E5) Peptidyl-tRNA hydrolase 2, mitochondrial precursor (EC 3.1.1.29) (PTH 2)                | 3 | 1.25 | 0.15 |
| <b>TOP1_HUMAN</b>  | (P11387) DNA topoisomerase I (EC 5.99.1.2)                                                       | 4 | 1.25 | 0.10 |
| <b>SMC4_HUMAN</b>  | (Q9NTJ3) Structural maintenance of chromosomes 4-like 1 protein                                  | 1 | 1.25 | N/A  |
| <b>PSD2_HUMAN</b>  | (Q13200) 26S proteasome non-ATPase regulatory subunit 2                                          | 2 | 1.25 | 0.04 |
| <b>IMMT_HUMAN</b>  | (Q16891) Mitochondrial inner membrane protein (Mitofilin) (p87/89)                               | 3 | 1.25 | 0.10 |
| <b>ACOD_HUMAN</b>  | (O00767) Acyl-CoA desaturase (EC 1.14.19.1) (Stearoyl-CoA desaturase) (Fatty acid desaturase)    | 2 | 1.25 | 0.02 |
| <b>COPA_HUMAN</b>  | (P53621) Coatamer alpha subunit (Alpha-coat protein) (Alpha-COP) (HEPCOP) (HEP-COP)              | 2 | 1.26 | 0.03 |
| <b>VPS45_HUMAN</b> | (Q9NRW7) Vacuolar protein sorting-associated protein 45 (h-VPS45)                                | 1 | 1.26 | N/A  |
| <b>NUBM_HUMAN</b>  | (P49821) NADH-ubiquinone oxidoreductase 51 kDa subunit, mitochondrial precursor (EC 1.6.5.3)     | 1 | 1.26 | N/A  |
| <b>UBP14_HUMAN</b> | (P54578) Ubiquitin carboxyl-terminal hydrolase 14 (EC 3.1.2.15) (Ubiquitin thiolesterase 14)     | 1 | 1.26 | N/A  |
| <b>PSD7_HUMAN</b>  | (P51665) 26S proteasome non-ATPase regulatory subunit 7 (26S proteasome regulatory subunit rpn8) | 1 | 1.26 | N/A  |
| <b>APC7_HUMAN</b>  | (Q9UJX3) Anaphase promoting complex subunit 7 (APC7) (Cyclosome subunit 7)                       | 1 | 1.27 | N/A  |
| <b>RAB10_HUMAN</b> | (P61026) Ras-related protein Rab-10                                                              | 6 | 1.27 | 0.11 |
| <b>ECHA_HUMAN</b>  | (P40939) Trifunctional enzyme alpha subunit, mitochondrial precursor (TP-alpha)                  | 7 | 1.27 | 0.14 |
| <b>L1CAM_HUMAN</b> | (P32004) Neural cell adhesion molecule L1 precursor (N-CAM L1) (CD171 antigen)                   | 2 | 1.27 | 0.11 |

|                         |                                                                                                     |   |      |      |
|-------------------------|-----------------------------------------------------------------------------------------------------|---|------|------|
| <b>IPO7_HUMAN</b>       | (O95373) Importin-7 (Imp7) (Ran-binding protein 7)<br>(RanBP7)                                      | 4 | 1.27 | 0.19 |
| <b>PRS10_HUMAN</b>      | (P62333) 26S protease regulatory subunit S10B<br>(Proteasome subunit p42)                           | 2 | 1.27 | 0.19 |
| <b>RL19_HUMAN</b>       | (P84098) 60S ribosomal protein L19                                                                  | 2 | 1.27 | 0.01 |
| <b>LMAN1_HUMAN</b>      | (P49257) ERGIC-53 protein precursor (ER-Golgi<br>intermediate compartment 53 kDa protein)           | 3 | 1.27 | 0.13 |
| <b>PSD10_HUMAN</b>      | (O75832) 26S proteasome non-ATPase regulatory subunit<br>10 (26S proteasome regulatory subunit p28) | 1 | 1.28 | N/A  |
| <b>ADT3_HUMAN</b>       | (P12236) ADP,ATP carrier protein, liver isoform T2<br>(ADP/ATP translocase 3)                       | 5 | 1.28 | 0.18 |
| <b>BAP28_HUMAN</b>      | (Q9H583) Protein BAP28                                                                              | 3 | 1.28 | 0.13 |
| <b>MLH3_HUMAN</b>       | (Q9UHC1) DNA mismatch repair protein Mlh3 (MutL<br>protein homolog 3)                               | 1 | 1.28 | N/A  |
| <b>HMOX2_HUMA<br/>N</b> | (P30519) Heme oxygenase 2 (EC 1.14.99.3) (HO-2)                                                     | 1 | 1.28 | N/A  |
| <b>SC61G_HUMAN</b>      | (P60059) Protein transport protein SEC61 gamma<br>subunit                                           | 2 | 1.28 | 0.03 |
| <b>VATE_HUMAN</b>       | (P36543) Vacuolar ATP synthase subunit E (EC 3.6.3.14)<br>(V-ATPase E subunit)                      | 4 | 1.28 | 0.18 |
| <b>RL12_HUMAN</b>       | (P30050) 60S ribosomal protein L12                                                                  | 2 | 1.28 | 0.01 |
| <b>ISP1_HUMAN</b>       | (Q14642) Type I inositol-1,4,5-trisphosphate 5-<br>phosphatase (EC 3.1.3.56) (5PTase)               | 1 | 1.28 | N/A  |
| <b>NUFM_HUMAN</b>       | (Q16718) NADH-ubiquinone oxidoreductase 13 kDa-B<br>subunit (EC 1.6.5.3) (EC 1.6.99.3)              | 1 | 1.28 | N/A  |
| <b>VDAC2_HUMAN</b>      | (P45880) Voltage-dependent anion-selective channel<br>protein 2 (VDAC-2)                            | 7 | 1.29 | 0.23 |
| <b>RIB1_HUMAN</b>       | (P04843) Dolichyl-diphosphooligosaccharide--protein<br>glycosyltransferase 67 kDa subunit precursor | 9 | 1.29 | 0.23 |
| <b>IMB1_HUMAN</b>       | (Q14974) Importin beta-1 subunit (Karyopherin beta-1                                                | 8 | 1.29 | 0.15 |

|                    |                                                                                                    |   |      |      |
|--------------------|----------------------------------------------------------------------------------------------------|---|------|------|
|                    | subunit) (Nuclear factor P97) (Importin 90)                                                        |   |      |      |
| <b>ODO2_HUMAN</b>  | (P36957) Dihydrolipoyllysine-residue succinyltransferase component of 2-oxoglutarate dehydrogenase | 6 | 1.31 | 0.20 |
| <b>DIC_HUMAN</b>   | (Q9UBX3) Mitochondrial dicarboxylate carrier                                                       | 1 | 1.32 | N/A  |
| <b>GPSN2_HUMAN</b> | (Q9NZ01) Synaptic glycoprotein SC2                                                                 | 1 | 1.34 | N/A  |
| <b>VDAC1_HUMAN</b> | (P21796) Voltage-dependent anion-selective channel protein 1 (VDAC-1)                              | 8 | 1.35 | 0.22 |
| <b>TNPO1_HUMAN</b> | (Q92973) Transportin-1 (Importin beta-2) (Karyopherin beta-2) (M9 region interaction protein)      | 3 | 1.36 | 0.13 |
| <b>HMOX1_HUMA</b>  | (P09601) Heme oxygenase 1 (EC 1.14.99.3) (HO-1)                                                    | 2 | 1.36 | 0.13 |
| <b>N</b>           |                                                                                                    |   |      |      |
| <b>TMP21_HUMAN</b> | (P49755) Transmembrane protein Tmp21 precursor (21 kDa transmembrane trafficking protein)          | 2 | 1.36 | 0.19 |
| <b>MPCP_HUMAN</b>  | (Q00325) Phosphate carrier protein, mitochondrial precursor (PTP)                                  | 2 | 1.37 | 0.17 |
| <b>B2MG_HUMAN</b>  | (P61769) Beta-2-microglobulin precursor                                                            | 1 | 1.37 | N/A  |
| <b>EG32_HUMAN</b>  | (Q969X5) ER-Golgi intermediate compartment 32 kDa protein (ERGIC-32) (HT034)                       | 1 | 1.38 | N/A! |
| <b>LETM1_HUMAN</b> | (O95202) Leucine zipper-EF-hand containing transmembrane protein 1, mitochondrial precursor        | 5 | 1.38 | 0.06 |
| <b>LMAN2_HUMAN</b> | (Q12907) Vesicular integral-membrane protein VIP36 precursor (GP36b glycoprotein)                  | 2 | 1.39 | 0.05 |
| <b>RAB35_HUMAN</b> | (Q15286) Ras-related protein Rab-35 (Rab-1C) (GTP-binding protein RAY)                             | 2 | 1.39 | 0.01 |
| <b>ATP5H_HUMAN</b> | (O75947) ATP synthase D chain, mitochondrial (EC 3.6.3.14)                                         | 2 | 1.39 | 0.11 |
| <b>VAPB_HUMAN</b>  | (O95292) Vesicle-associated membrane protein-associated protein B/C (VAMP-associated protein B/C)  | 3 | 1.40 | 0.20 |
| <b>NCPR_HUMAN</b>  | (P16435) NADPH--cytochrome P450 reductase (EC 1.6.2.4) (CPR) (P450R)                               | 1 | 1.40 | N/A  |



|                    |                                                                                                     |    |      |      |
|--------------------|-----------------------------------------------------------------------------------------------------|----|------|------|
| <b>LAP2B_HUMAN</b> | (P42167) Lamina-associated polypeptide 2, isoforms beta/gamma (Thymopoietin, isoforms beta/gamma)   | 3  | 1.41 | 0.17 |
| <b>GCN1L_HUMAN</b> | (Q92616) GCN1-like protein 1 (HsGCN1)                                                               | 10 | 1.42 | 0.27 |
| <b>CTR1_HUMAN</b>  | (P30825) High-affinity cationic amino acid transporter-1 (CAT-1)                                    | 1  | 1.42 | N/A  |
| <b>FETUA_HUMAN</b> | (P02765) Alpha-2-HS-glycoprotein precursor (Fetuin-A)(Alpha-2-Z-globulin)                           | 2  | 1.43 | 0.20 |
| <b>ABCD3_HUMAN</b> | (P28288) ATP-binding cassette, sub-family D, member 3 (70 kDa peroxisomal membrane protein) (PMP70) | 6  | 1.43 | 0.18 |
| <b>VATC_HUMAN</b>  | (P21283) Vacuolar ATP synthase subunit C (EC 3.6.3.14)(V-ATPase C subunit)                          | 4  | 1.44 | 0.13 |
| <b>ODO1_HUMAN</b>  | (Q02218) 2-oxoglutarate dehydrogenase E1 component, mitochondrial precursor (EC 1.2.4.2)            | 4  | 1.44 | 0.22 |
| <b>UQCR2_HUMAN</b> | (P22695) Ubiquinol-cytochrome-c reductase complex core protein 2, mitochondrial precursor           | 2  | 1.46 | 0.11 |
| <b>S61A1_HUMAN</b> | (P61619) Protein transport protein Sec61 alpha subunit isoform 1 (Sec61 alpha-1)                    | 2  | 1.46 | 0.08 |
| <b>TFR1_HUMAN</b>  | (P02786) Transferrin receptor protein 1 (TfR1) (CD71 antigen)                                       | 12 | 1.47 | 0.25 |
| <b>CY1_HUMAN</b>   | (P08574) Cytochrome c 1, heme protein, mitochondrial precursor (Cytochrome c-1)                     | 2  | 1.47 | 0.15 |
| <b>RAB1A_HUMAN</b> | (P62820) Ras-related protein Rab-1A (YPT1-related protein)                                          | 3  | 1.49 | 0.11 |
| <b>ADT2_HUMAN</b>  | (P05141) ADP, ATP carrier protein, fibroblast isoform (ADP/ATP translocase)                         | 4  | 1.50 | 0.06 |
| <b>UQCR1_HUMAN</b> | (P31930) Ubiquinol-cytochrome-c reductase complex core protein I, mitochondrial precursor           | 2  | 1.54 | 0.01 |
| <b>PRKDC_HUMAN</b> | (P78527) DNA-dependent protein kinase catalytic subunit (EC 2.7.1.37) (DNA-PKcs) (DNPK1) (p460)     | 18 | 1.55 | 0.20 |
| <b>RB11B_HUMAN</b> | (Q15907) Ras-related protein Rab-11B (GTP-binding                                                   | 5  | 1.55 | 0.08 |

|                    |                                                                                                                          |   |      |      |
|--------------------|--------------------------------------------------------------------------------------------------------------------------|---|------|------|
|                    | protein YPT3)                                                                                                            |   |      |      |
| <b>COX5B_HUMAN</b> | (P10606) Cytochrome c oxidase polypeptide Vb, mitochondrial precursor (EC 1.9.3.1)                                       | 2 | 1.56 | 0.13 |
| <b>FACE1_HUMAN</b> | (O75844) CAAX prenyl protease 1 homolog (EC 3.4.24.84)(Prenyl protein-specific endoprotease 1)                           | 4 | 1.58 | 0.05 |
| <b>PIGS_HUMAN</b>  | (Q96S52) GPI transamidase component PIG-S                                                                                | 1 | 1.59 | N/A  |
| <b>ATP5I_HUMAN</b> | (P56385) ATP synthase e chain, mitochondrial (EC 3.6.3.14)                                                               | 1 | 1.59 | N/A  |
| <b>CN094_HUMAN</b> | (Q9H6D7) Protein C14orf94                                                                                                | 1 | 1.60 | N/A  |
| <b>CX7A2_HUMAN</b> | (P14406) Cytochrome c oxidase polypeptide VIIa-liver/heart, mitochondrial precursor (EC 1.9.3.1)                         | 2 | 1.61 | 0.04 |
| <b>VAPA_HUMAN</b>  | (Q9P0L0) Vesicle-associated membrane protein-associated protein A (VAMP-associated protein A)                            | 2 | 1.66 | 0.11 |
| <b>CALX_HUMAN</b>  | (P27824) Calnexin precursor (Major histocompatibility complex class I antigen-binding protein p88)                       | 1 | 1.71 | N/A  |
| <b>4F2_HUMAN</b>   | (P08195) 4F2 cell-surface antigen heavy chain (4F2hc, SLC3A2, CD98)<br>(Lymphocyte activation antigen 4F2 large subunit) | 7 | 1.75 | 0.06 |
| <b>DCD_HUMAN</b>   | (P81605) Dermcidin precursor (Preproteolysin) [Contains: Survival-promoting peptide; DCD-1]                              | 2 | 1.79 | 0.06 |
| <b>HBA_HUMAN</b>   | (P69905) Hemoglobin alpha chain                                                                                          | 6 | 1.81 | 0.18 |
| <b>RL37_HUMAN</b>  | (P61927) 60S ribosomal protein L37 (G1.16)                                                                               | 1 | 1.81 | N/A  |
| <b>SRP09_HUMAN</b> | (P49458) Signal recognition particle 9 kDa protein (SRP9)                                                                | 1 | 1.83 | N/A  |
| <b>MVP_HUMAN</b>   | (Q14764) Major vault protein (MVP)<br>(Lung resistance-related protein)                                                  | 2 | 1.97 | 0.06 |

No indicates the number of unique peptides identified. RA represents relative abundance ratio of virus-infection (I): mock-infection (M) peptide signals. SD, standard deviation. N/A, not applicable.

**(1B). Relative abundance distribution of 570 quantified proteins.**

Relative abundance = protein abundance in the infected cells/ protein abundance in the mock-infected cells. 97% of of all quantified proteins fell within the range of ratio 0.5-1.5, which are marked by the red lines.

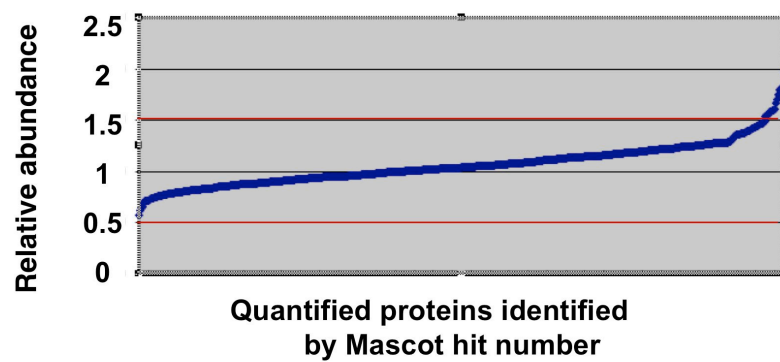

Supplement: supp_86.9.4868_SupplementalS1.pdf [file supp_86.9.4868_SupplementalS1.pdf]
